# Supplementary material for: Design of carboxylate-based ionic liquids (ILs) containing OH and CF3 groups; influence of intramolecular hydrogen bonds and inductive effect on the binding energy between the cation and anion of ILs, a DFT study
Source: Royal Society of Chemistry journal article supplement (doi:10.1039/d0nj04176a), 2021-01-01
Supplement: d0nj04176a1.pdf [file d0nj04176a1.pdf]

**Electronic Supplementary Information**

**Design of Carboxylate-Based Ionic Liquids (ILs) Containing OH and CF<sub>3</sub> groups; Influence of Intramolecular Hydrogen Bond and Inductive Effect on Binding Energy between Cation and Anion of ILs, A DFT study**

Sepideh Kalhor, Alireza Fattahi\*

**Department of Chemistry, Sharif University of Technology, Tehran, Iran**

\* Corresponding Author: [fattahi@sharif.edu](mailto:fattahi@sharif.edu)

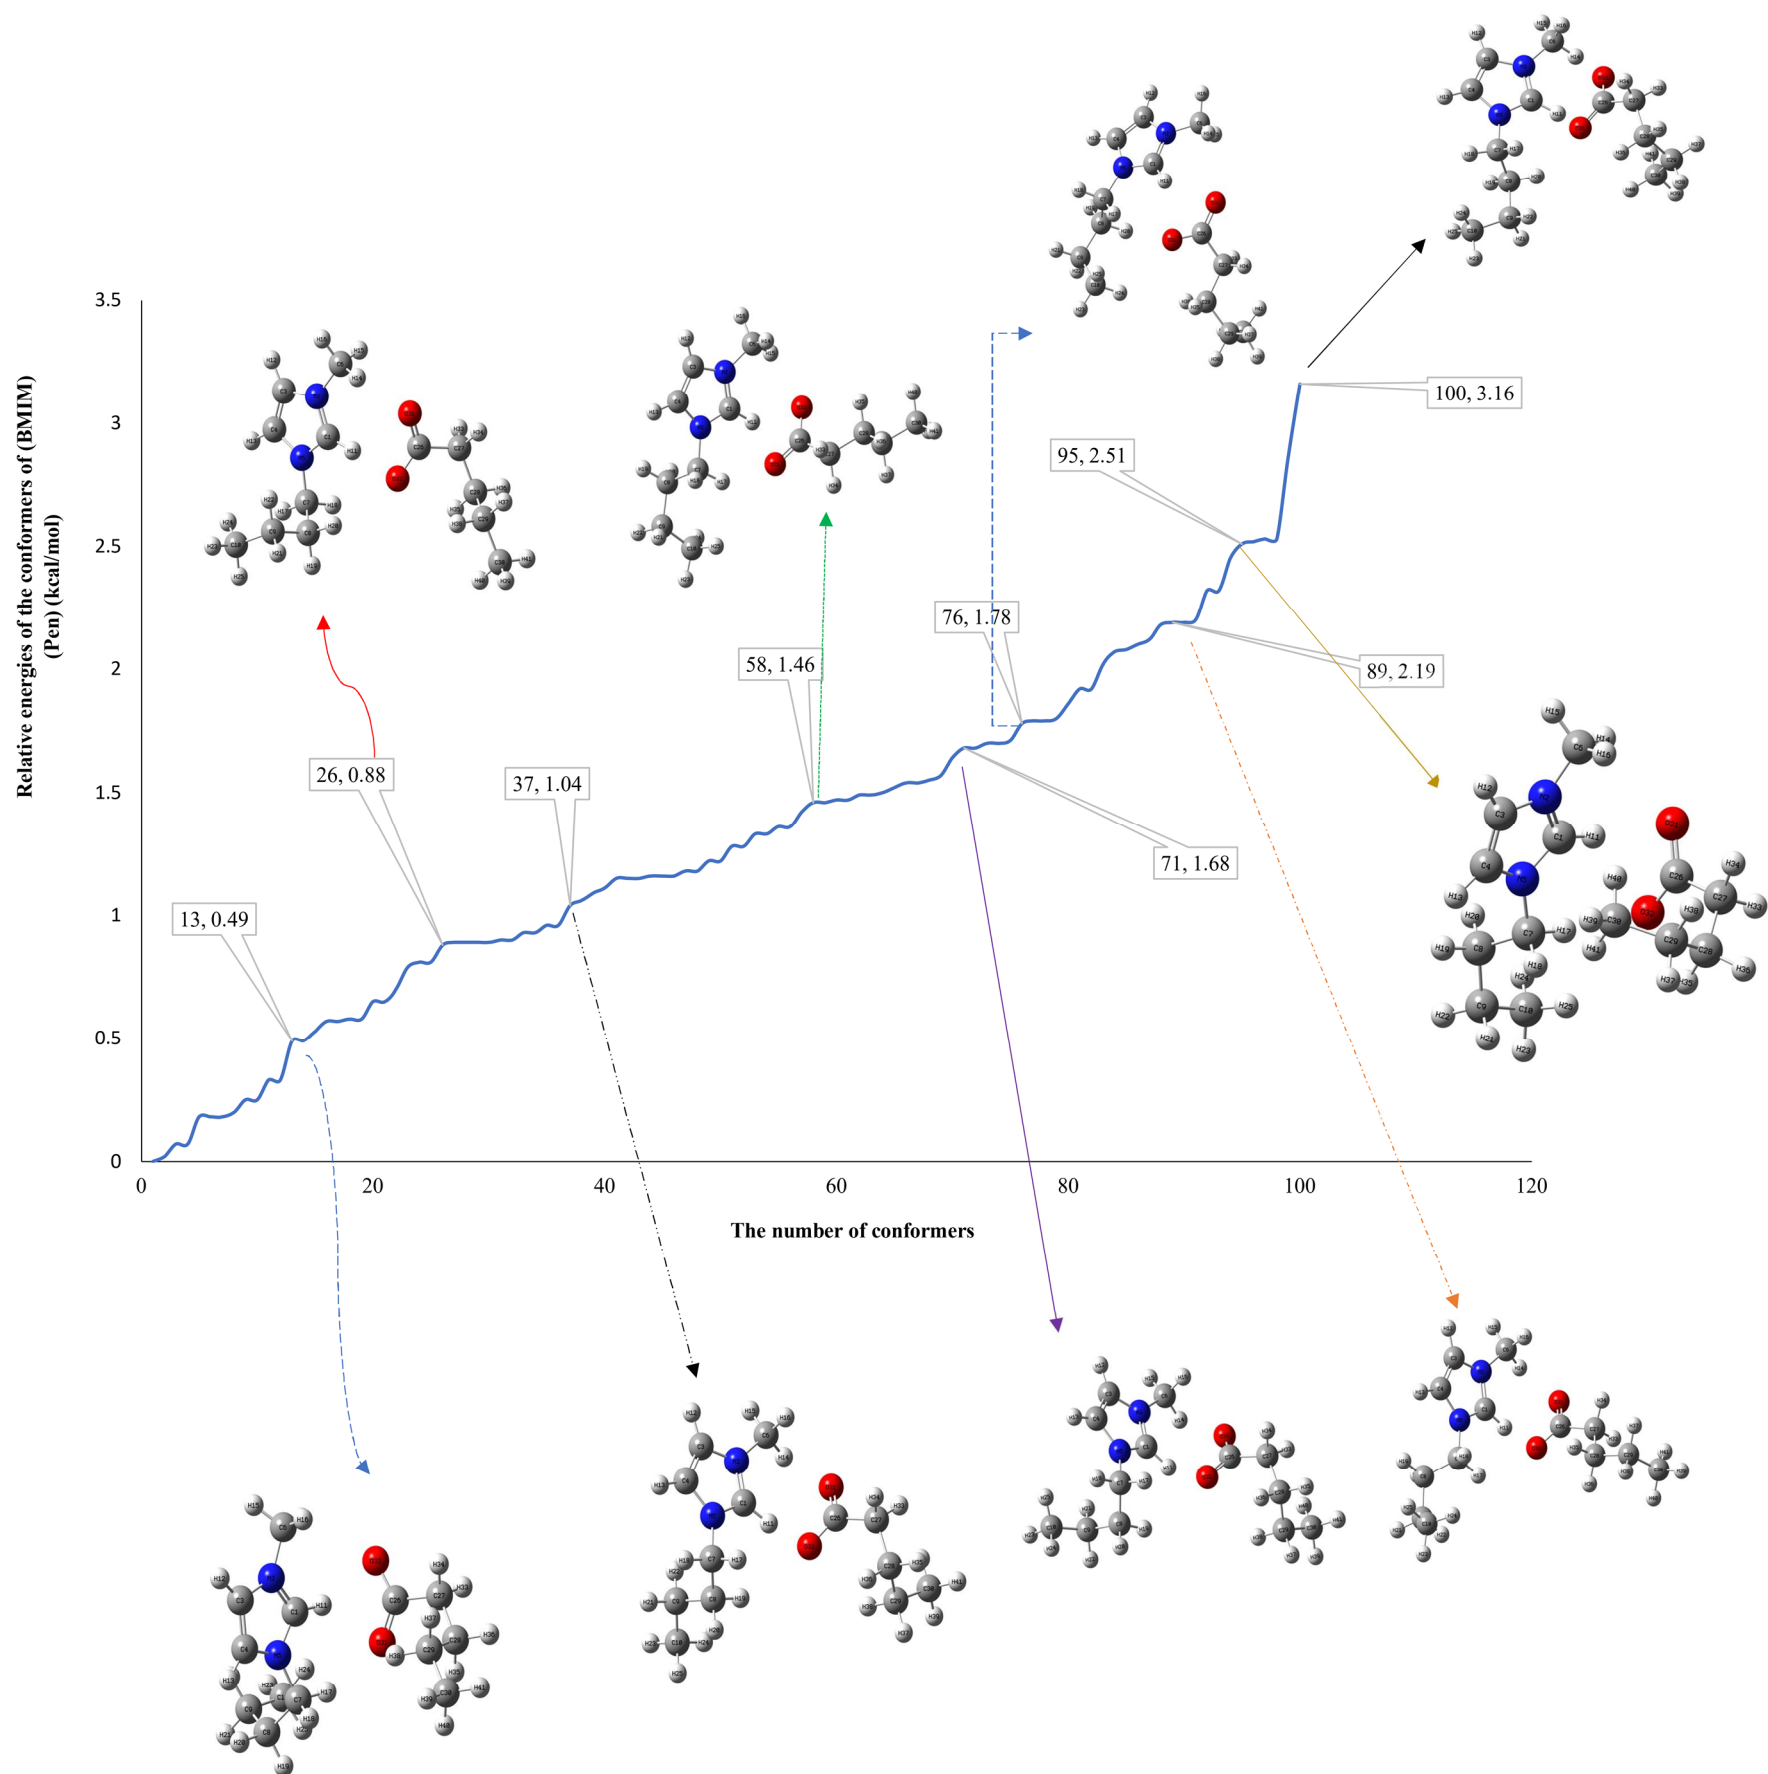

**Figure S1.** Relative energies of the conformers of (BMIM) (Pen) with respect to the most stable conformer

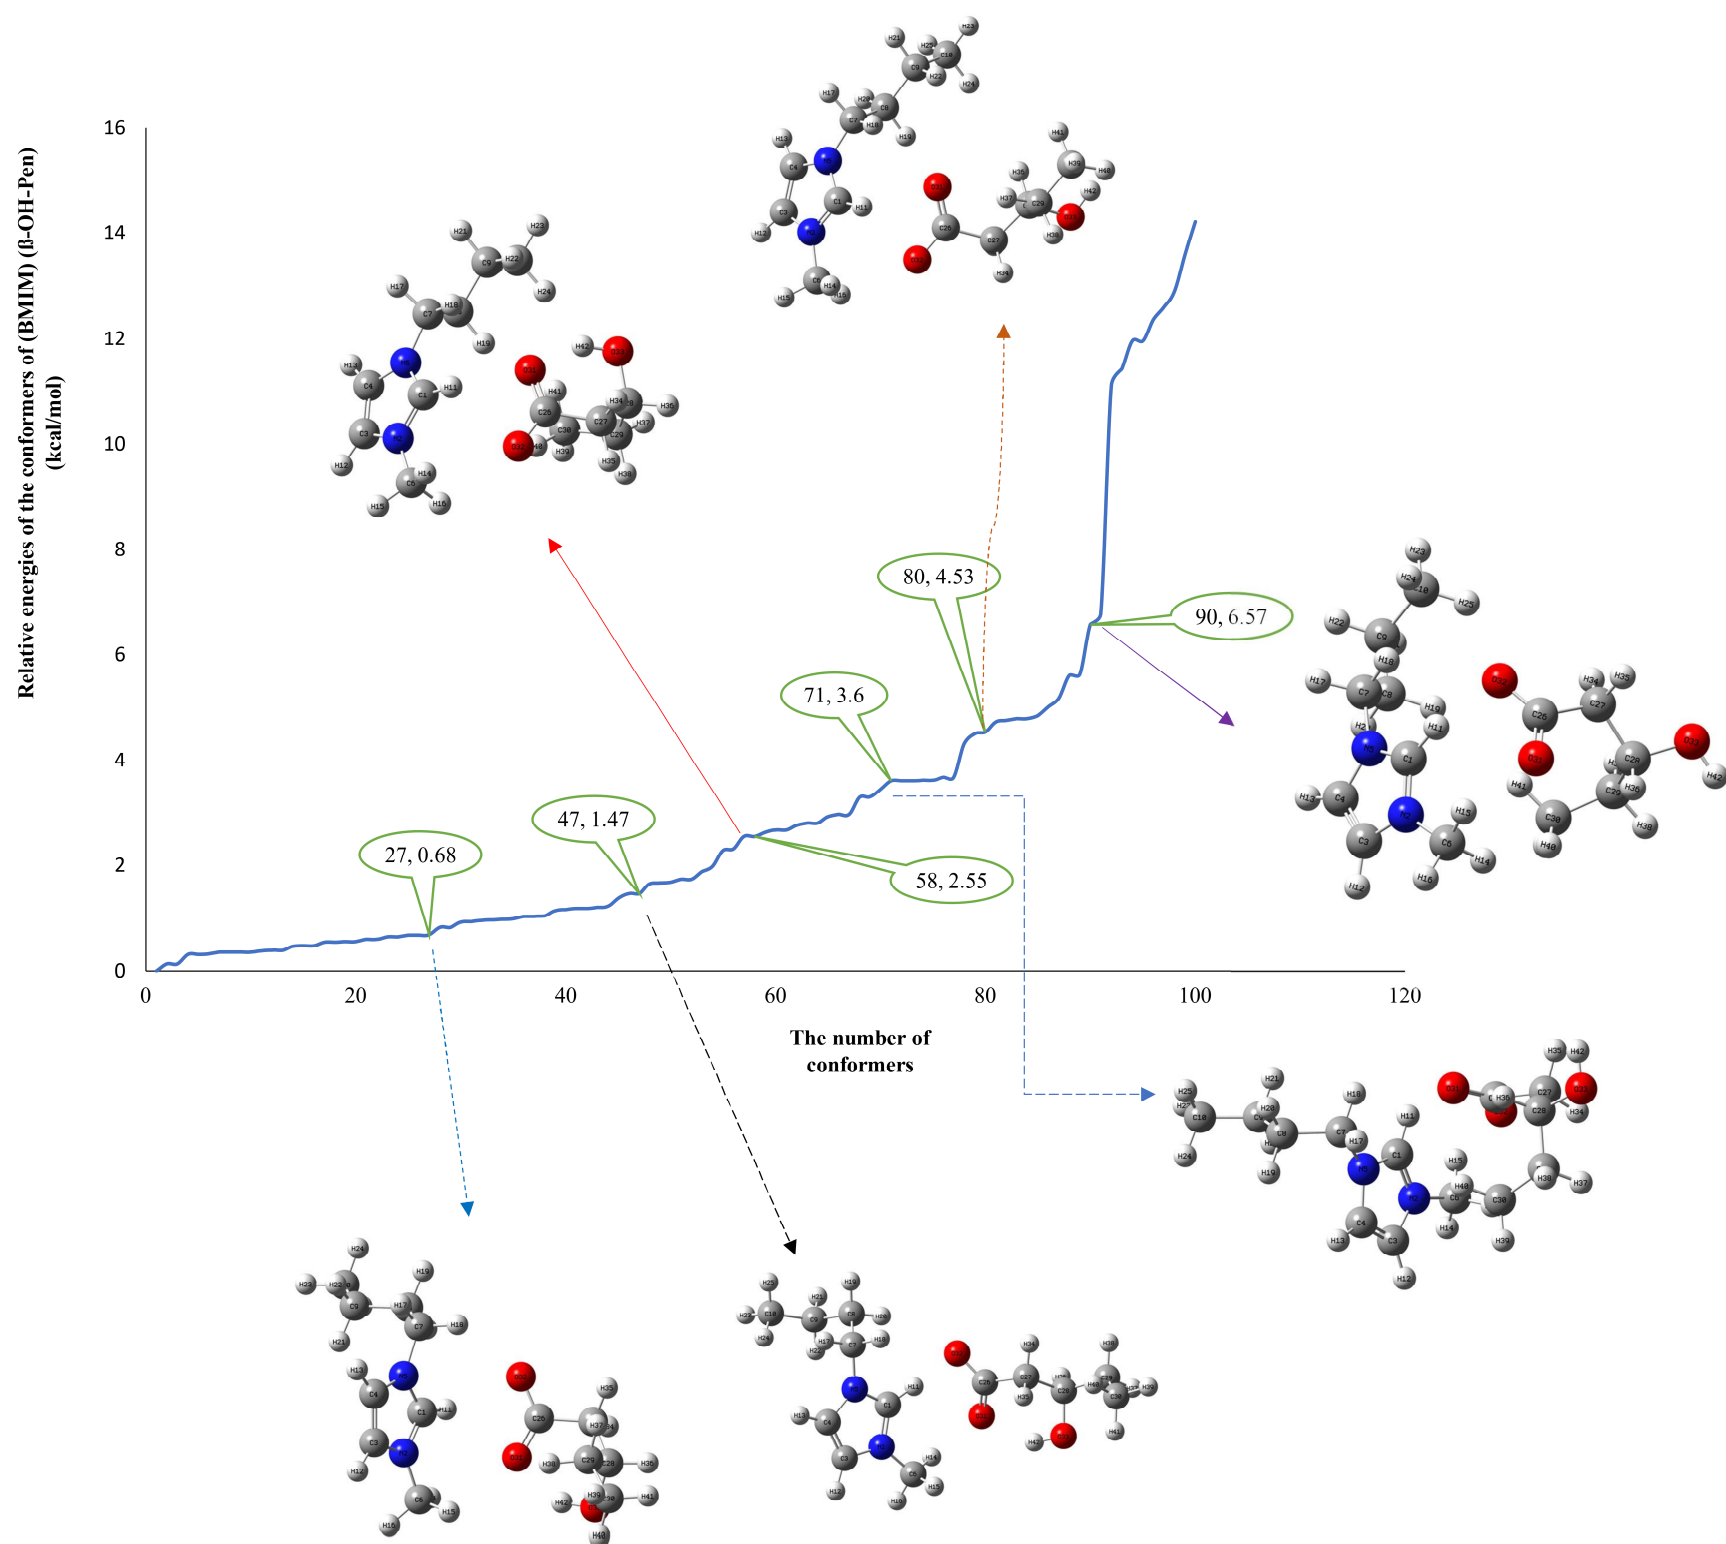

**Figure S2.** Relative energies of the conformers of (BMIM) ( $\beta$ -OH-Pen) with respect to the most stable conformer

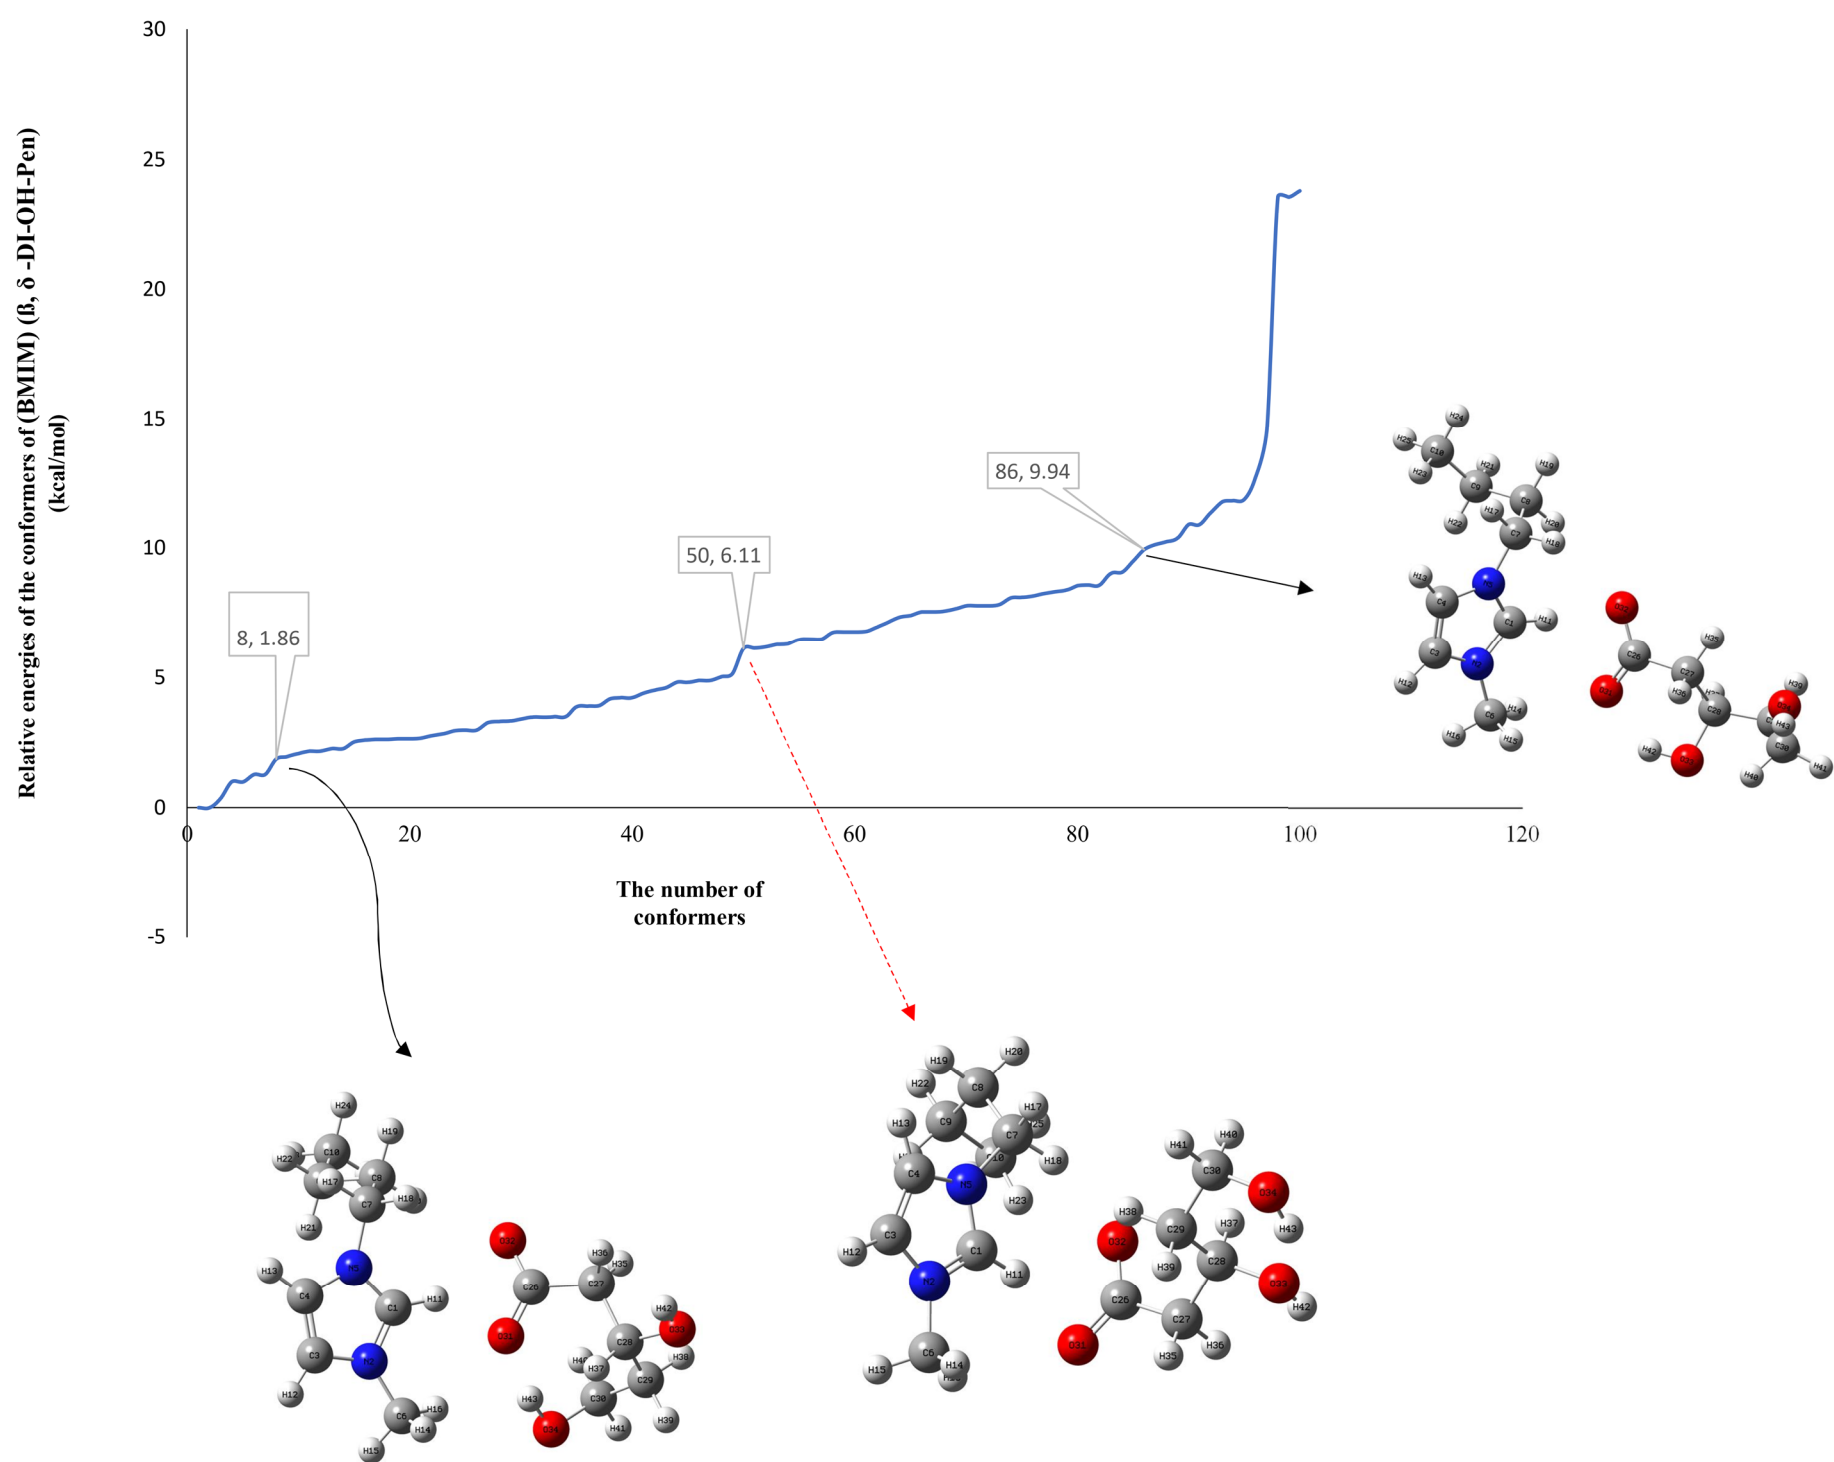

**Figure S3.** Relative energies of the conformers of (BMIM) ( $\beta, \delta$  -DI-OH-Pen) with respect to the most stable conformer

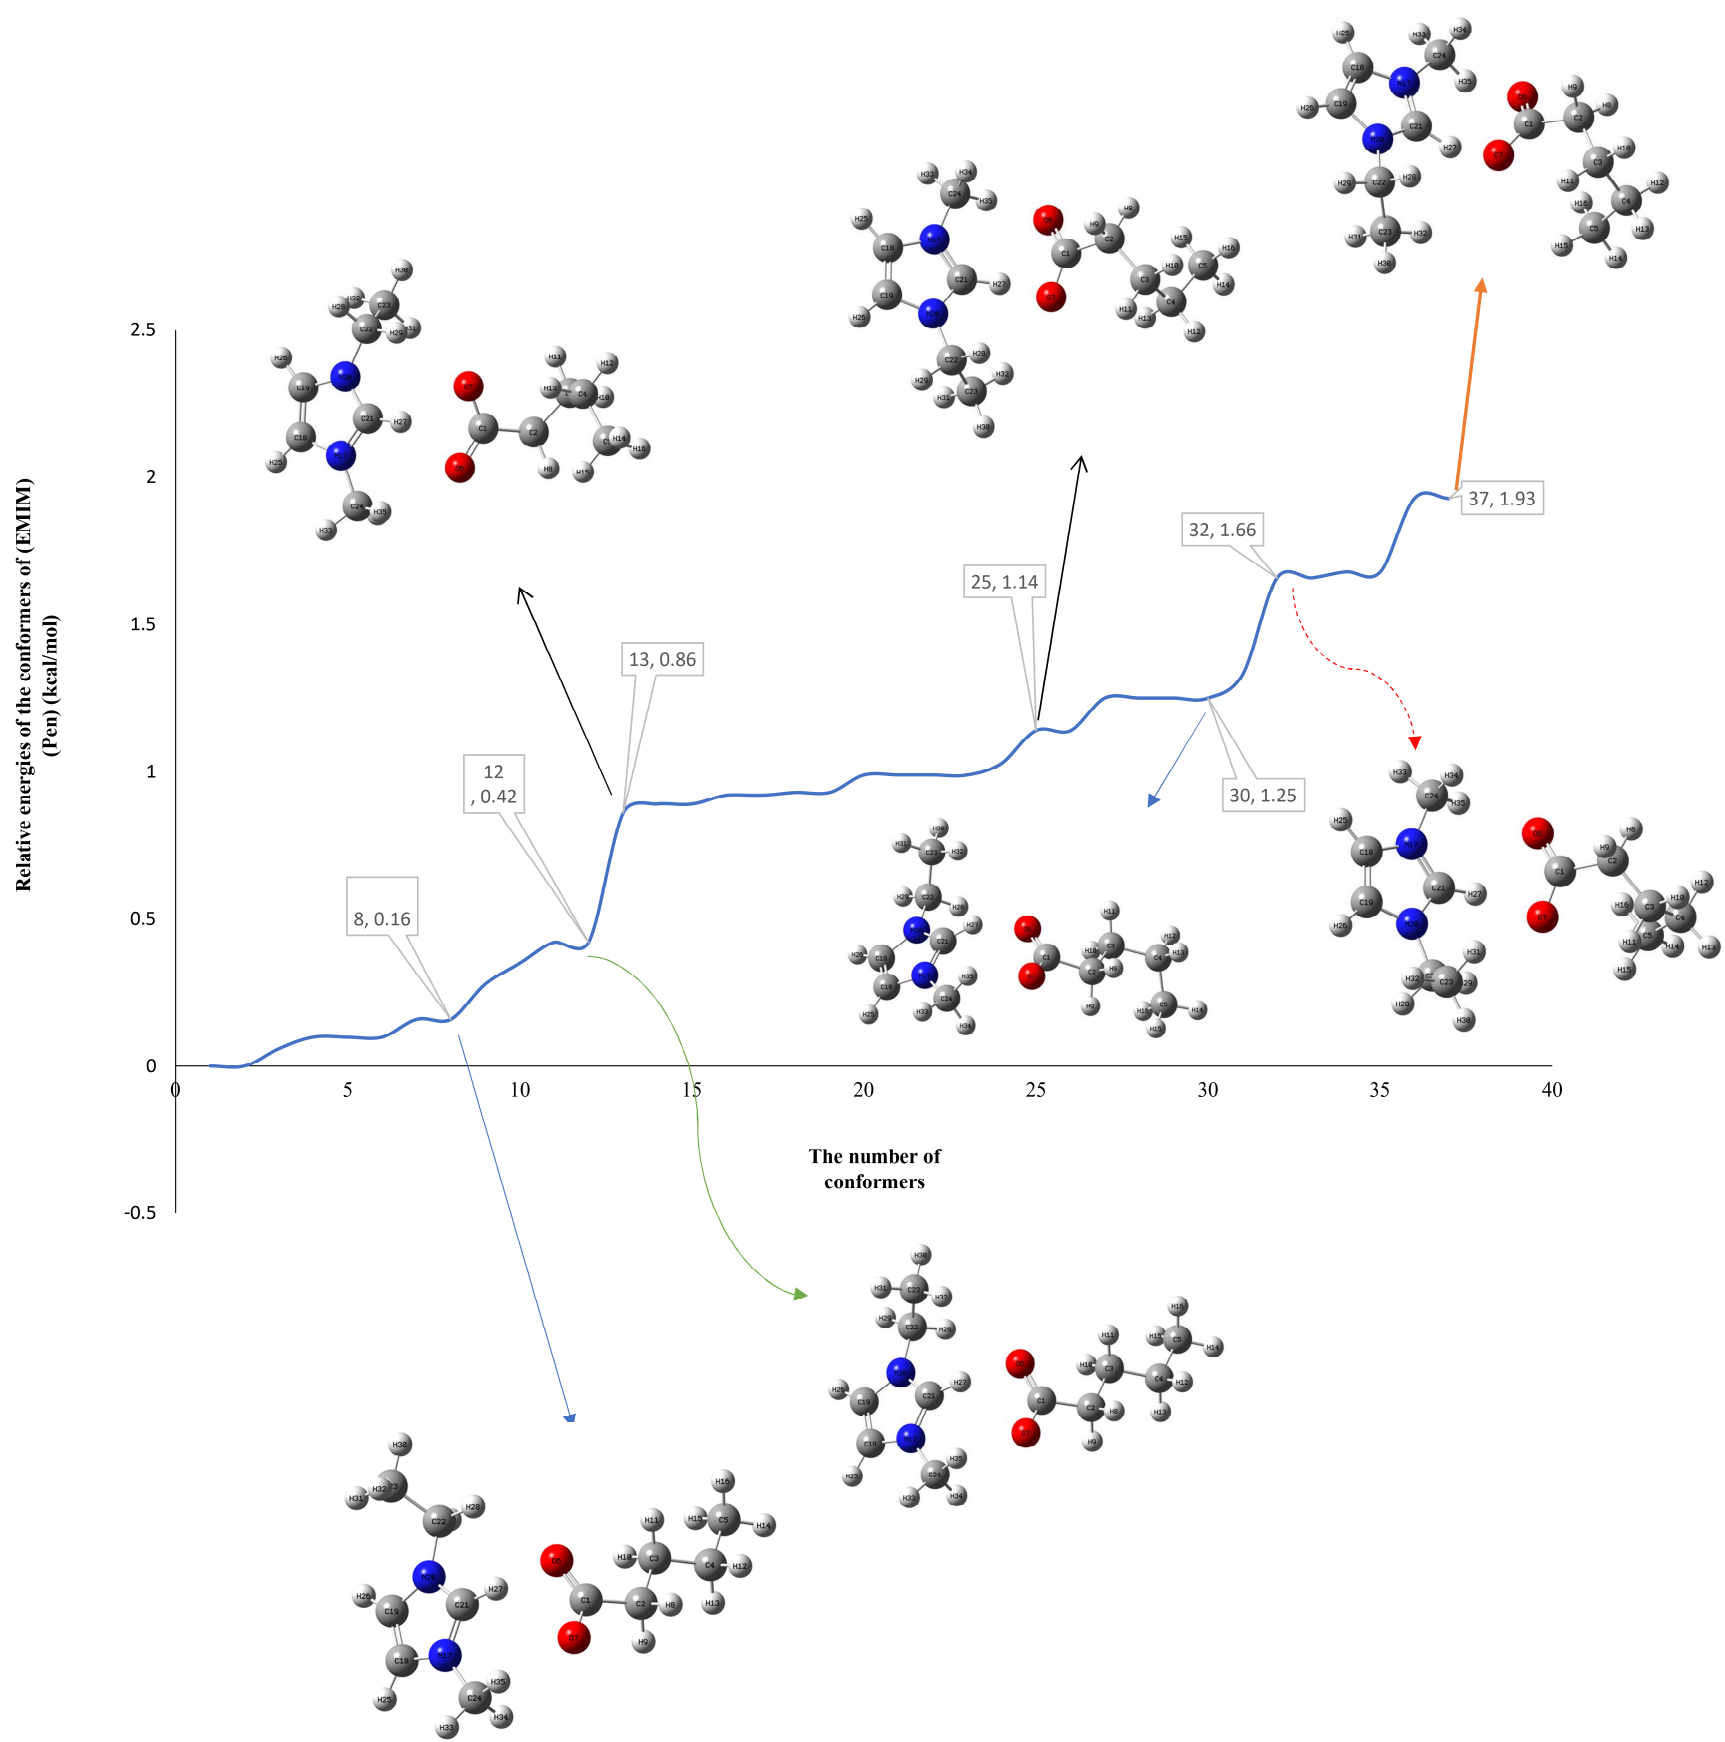

**Figure S4.** Relative energies of the conformers of (EMIM) (Pen) with respect to the most stable conformer.

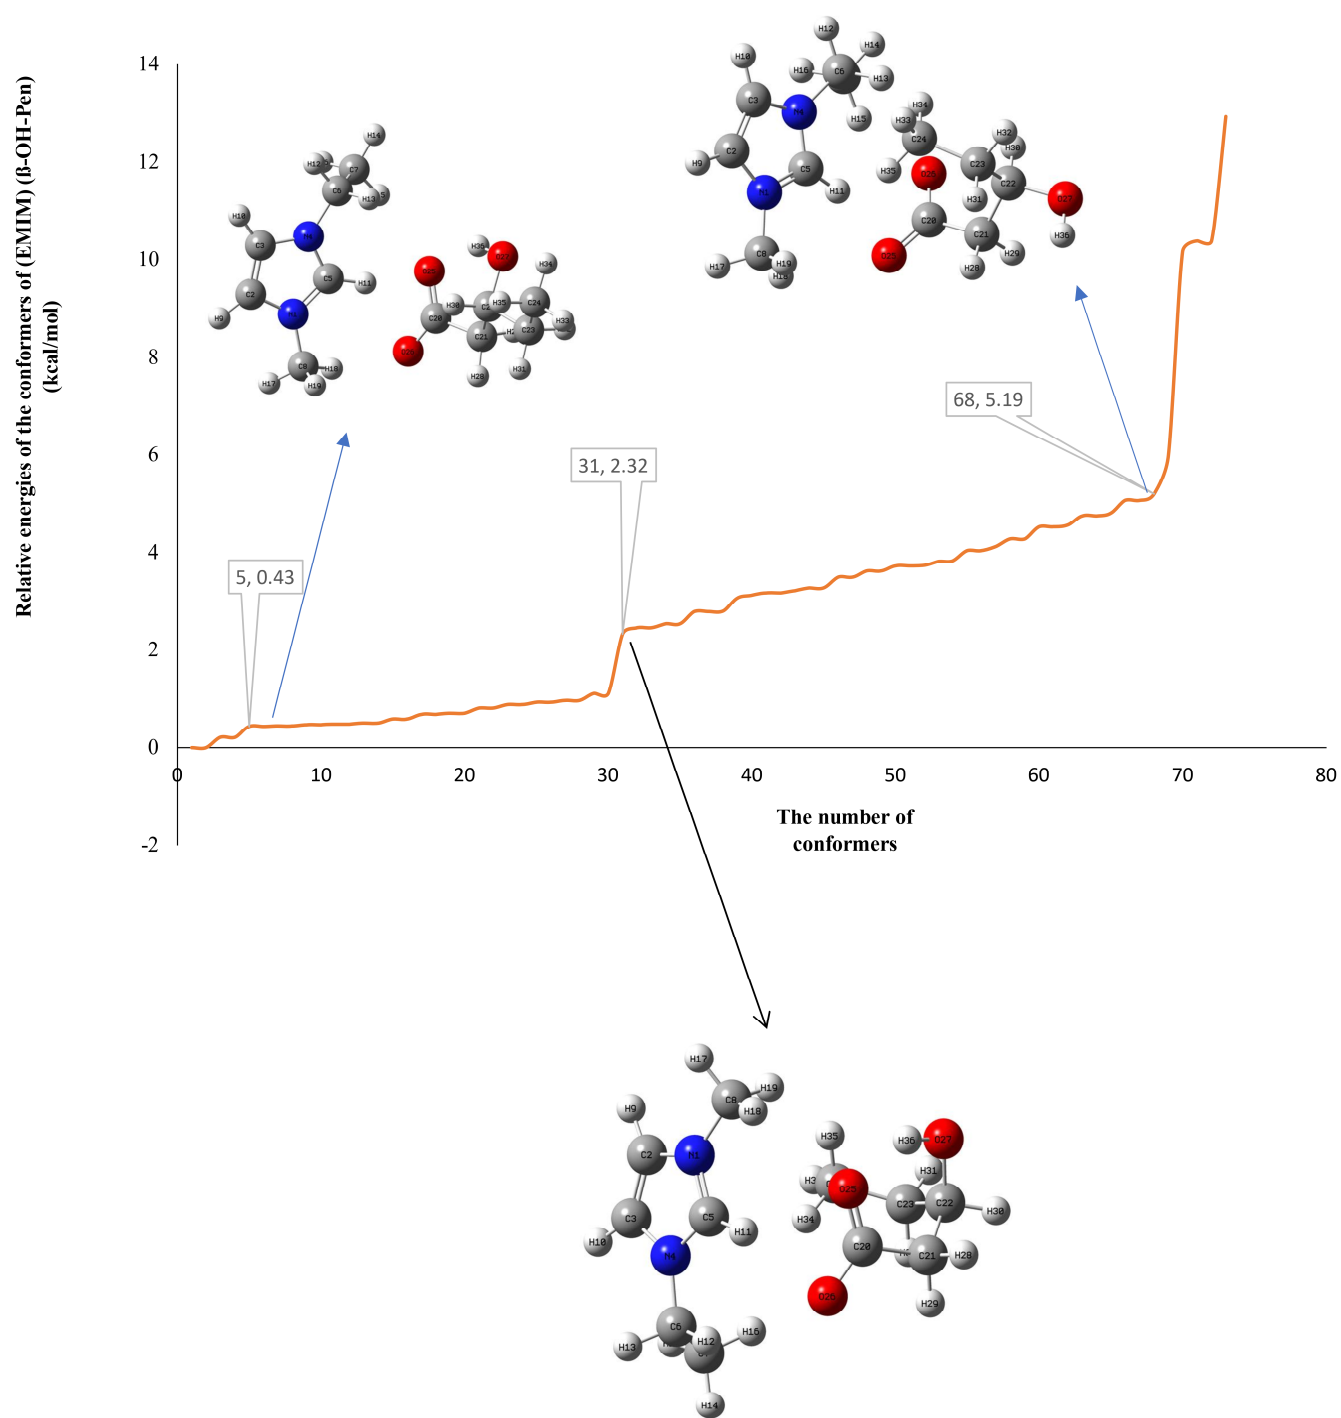

**Figure S5.** Relative energies of the conformers of (EMIM) ( $\beta$ -OH-Pen) with respect to the most stable conformer

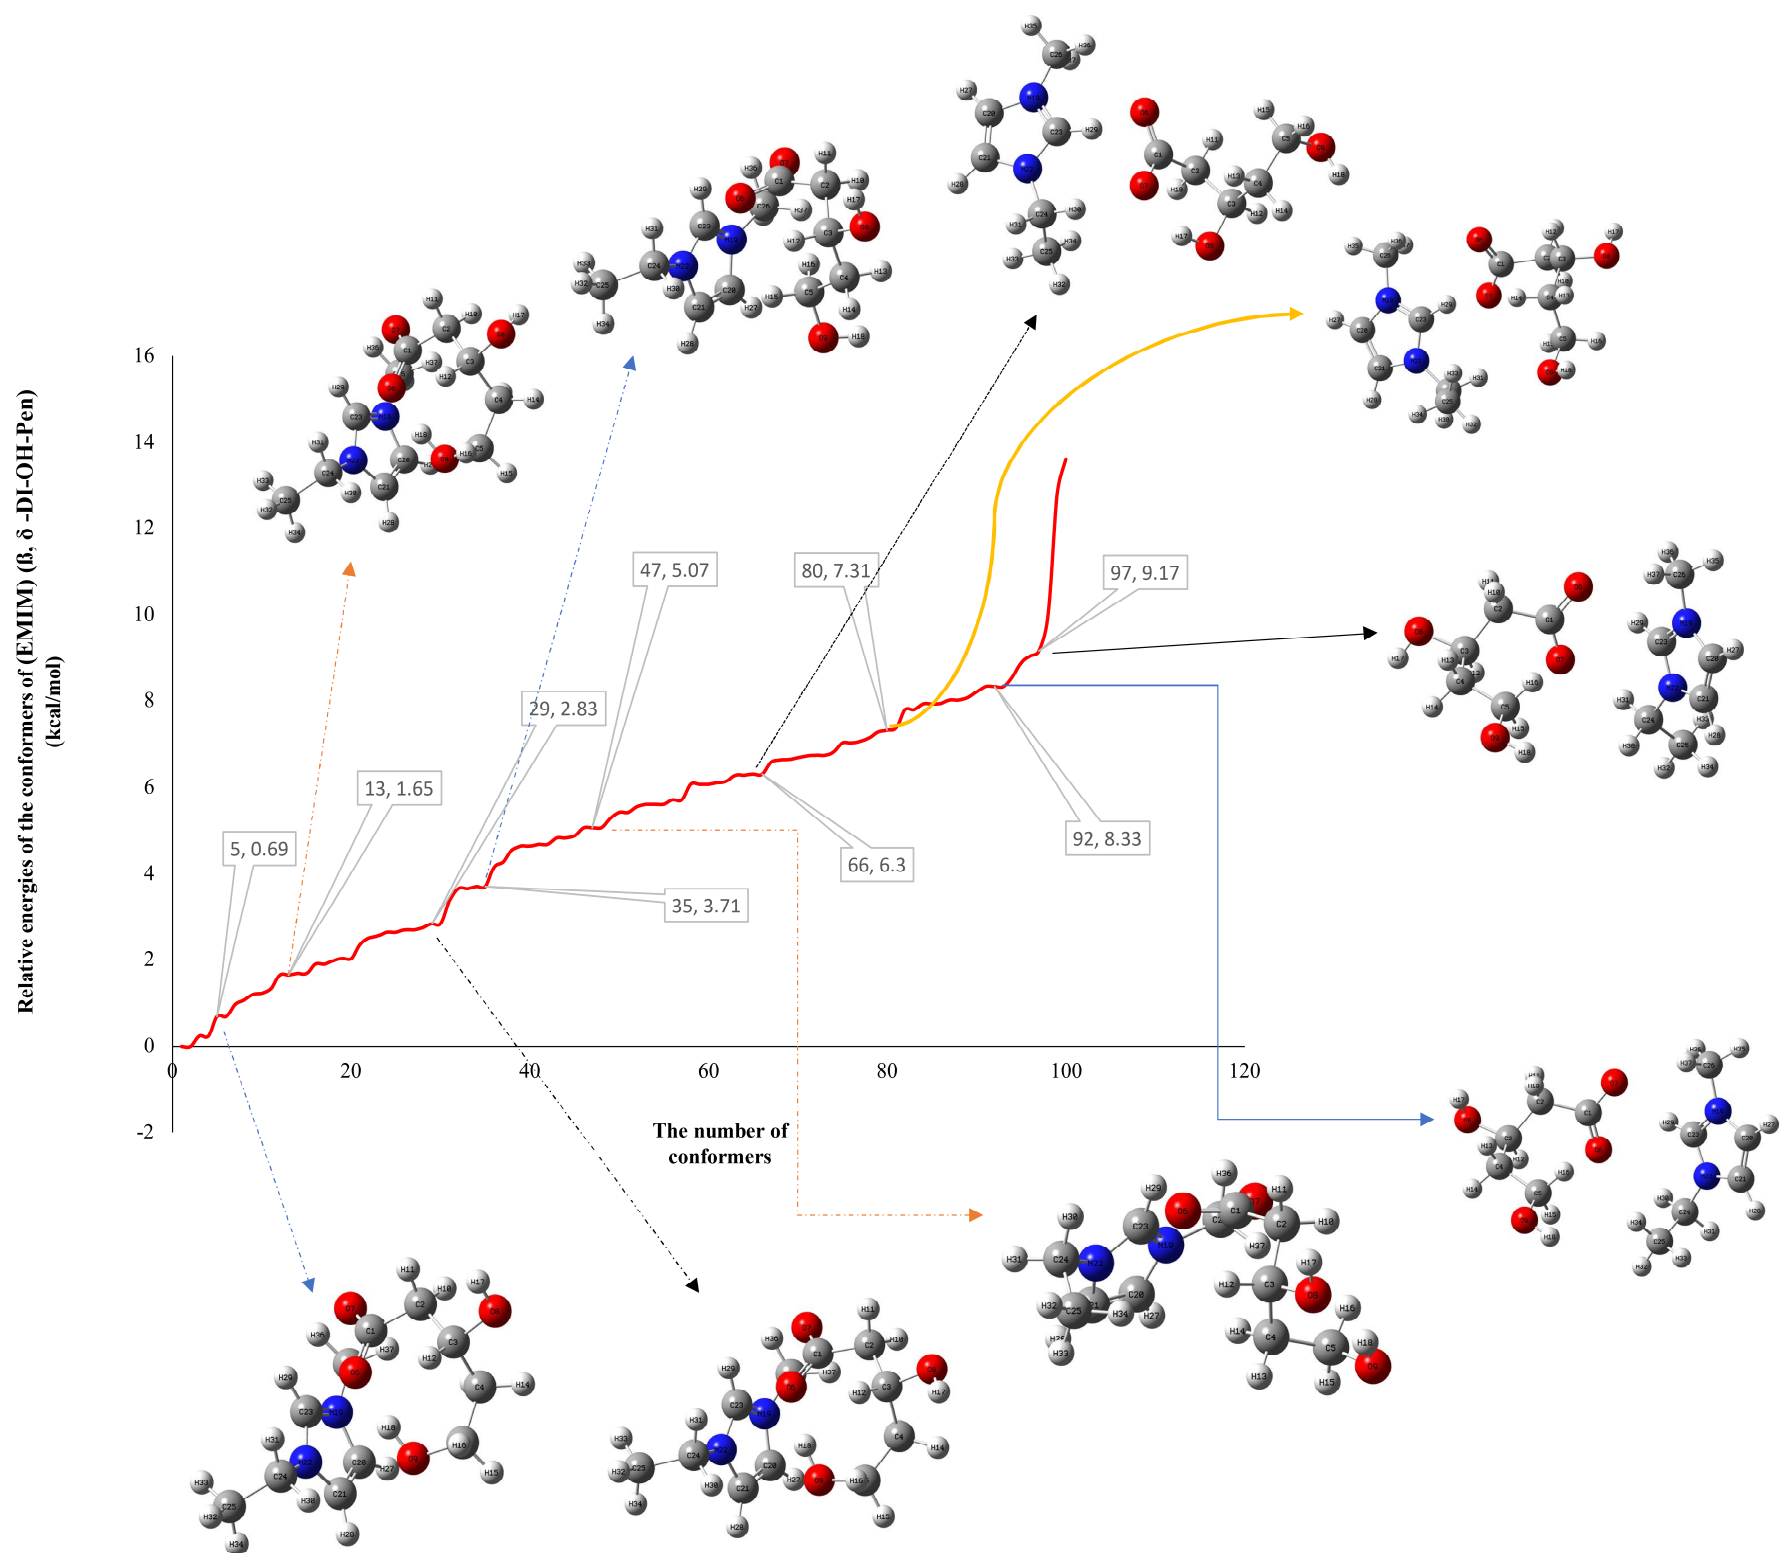

**Figure S6.** Relative energies of the conformers of (EMIM) ( $\beta$ ,  $\delta$  -DI-OH-Pen) with respect to the most stable conformer
