# Supplementary material for: Design of carboxylate-based ionic liquids (ILs) containing OH and CF3 groups; influence of intramolecular hydrogen bonds and inductive effect on the binding energy between the cation and anion of ILs, a DFT study
Source: Royal Society of Chemistry journal article supplement (doi:10.1039/d0nj04176a), 2021-01-01
Supplement: d0nj04176a2.pdf [file d0nj04176a2.pdf]

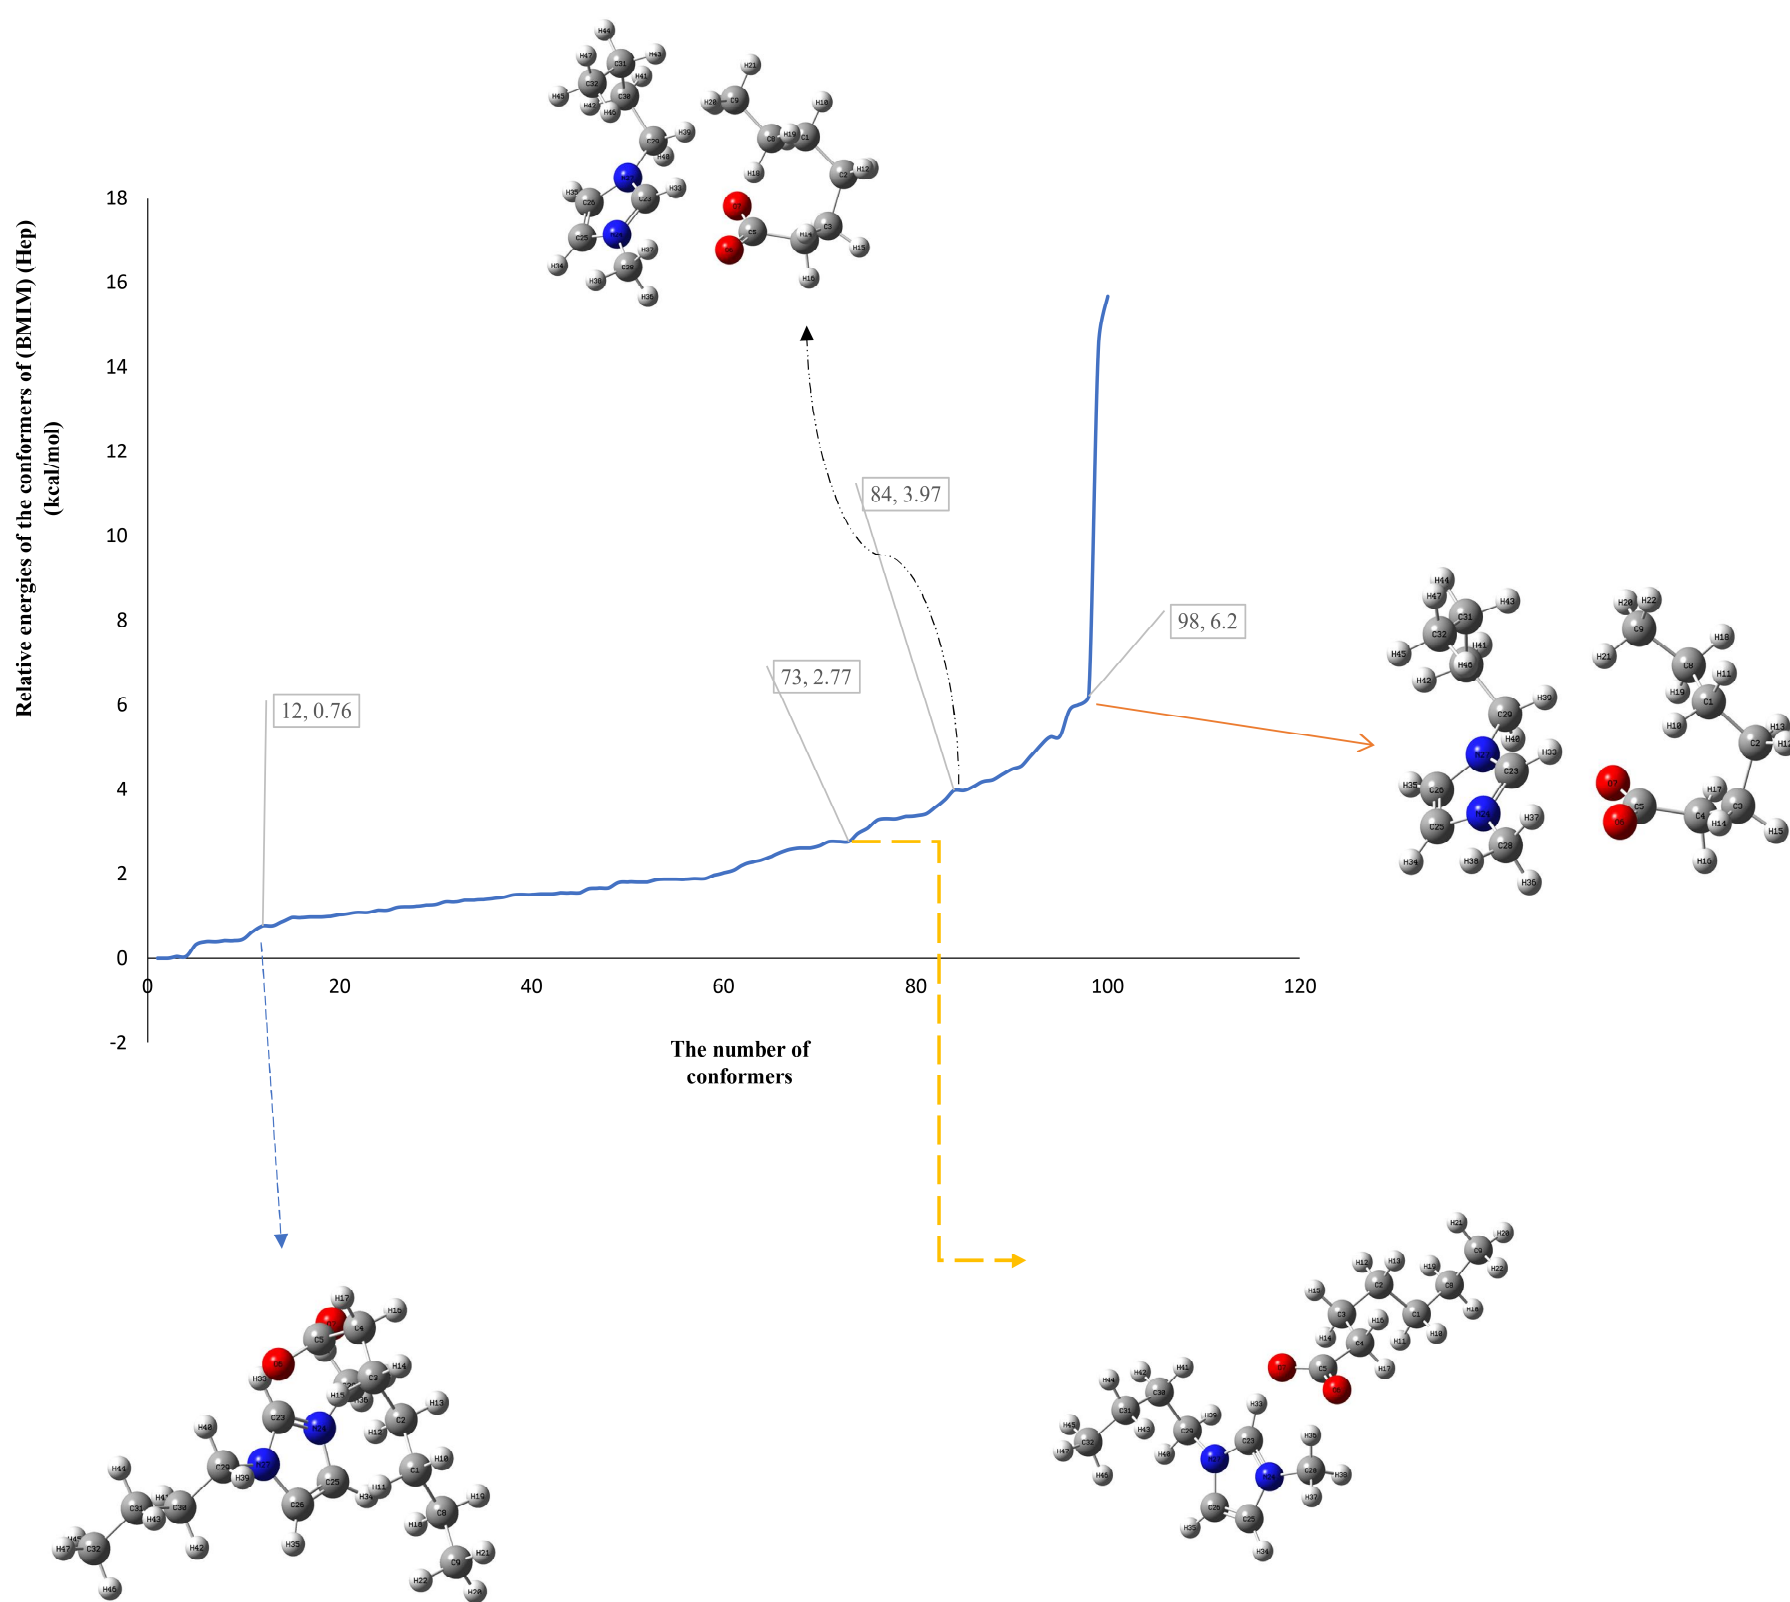

**Figure S7.** Relative energies of the conformers of (BMIM)(Hep) with respect to the most stable conformer

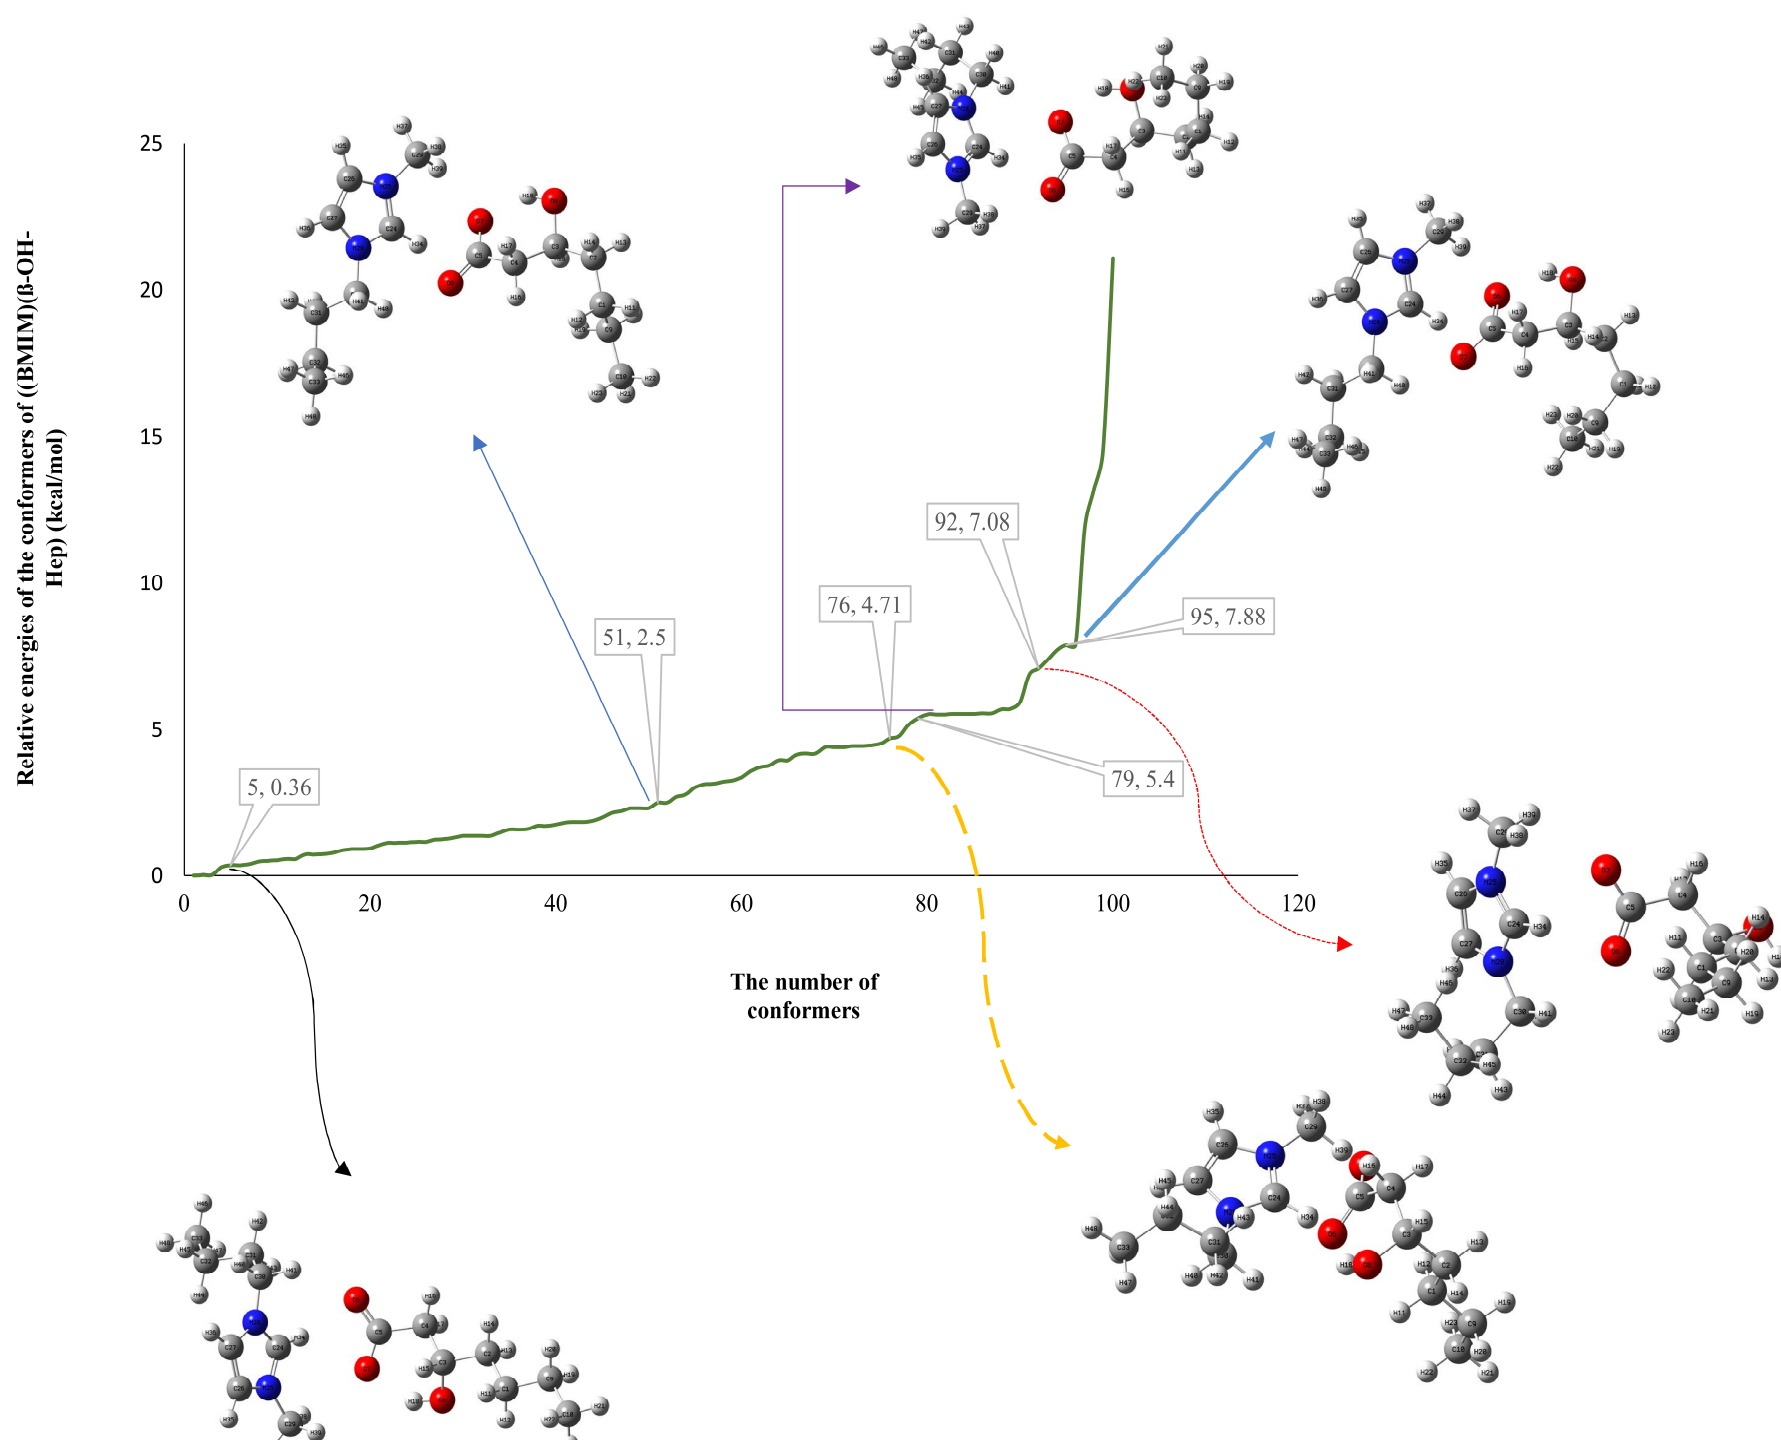

**Figure S8.** Relative energies of the conformers of (BMIM)(β-OH-Hep) with respect to the most stable conformer

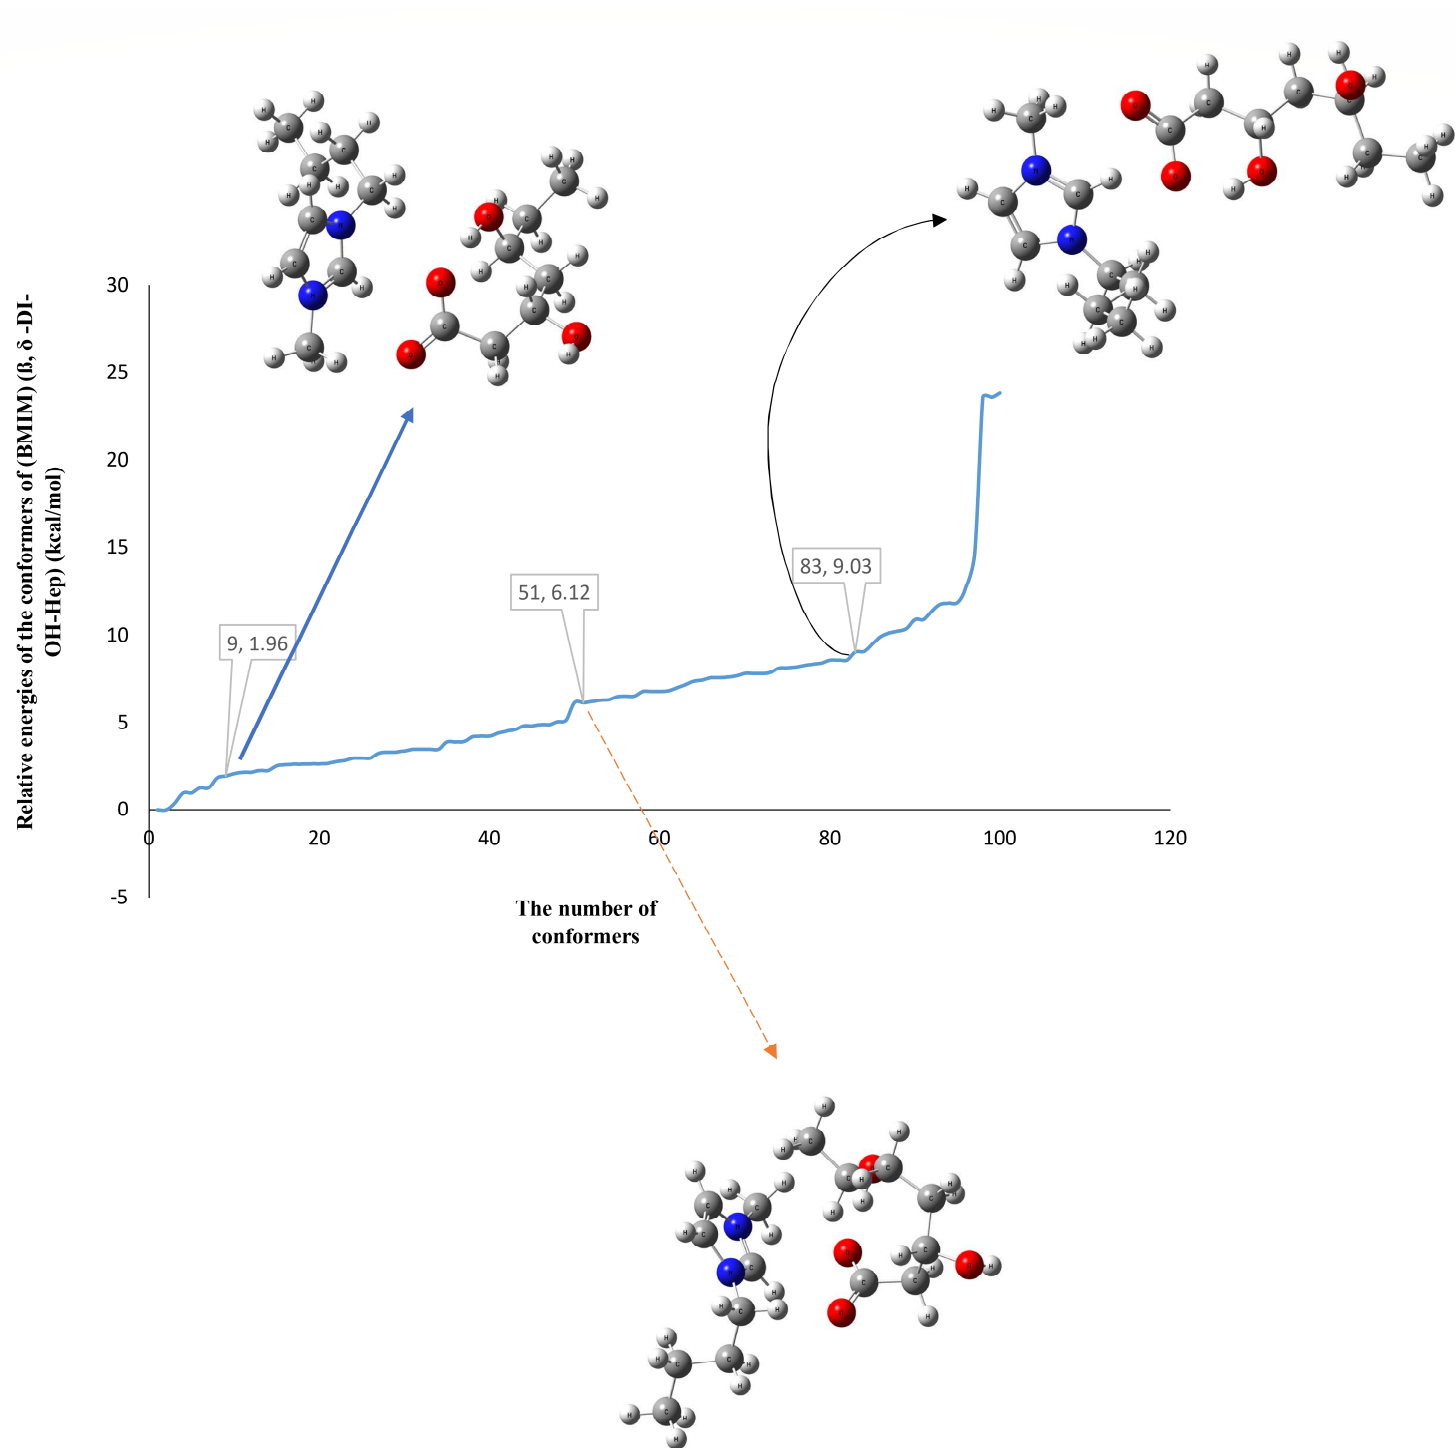

**Figure S9.** Relative energies of the conformers of (BMIM) ( $\beta$ ,  $\delta$  -DI-OH-Hep) with respect to the most stable conformer

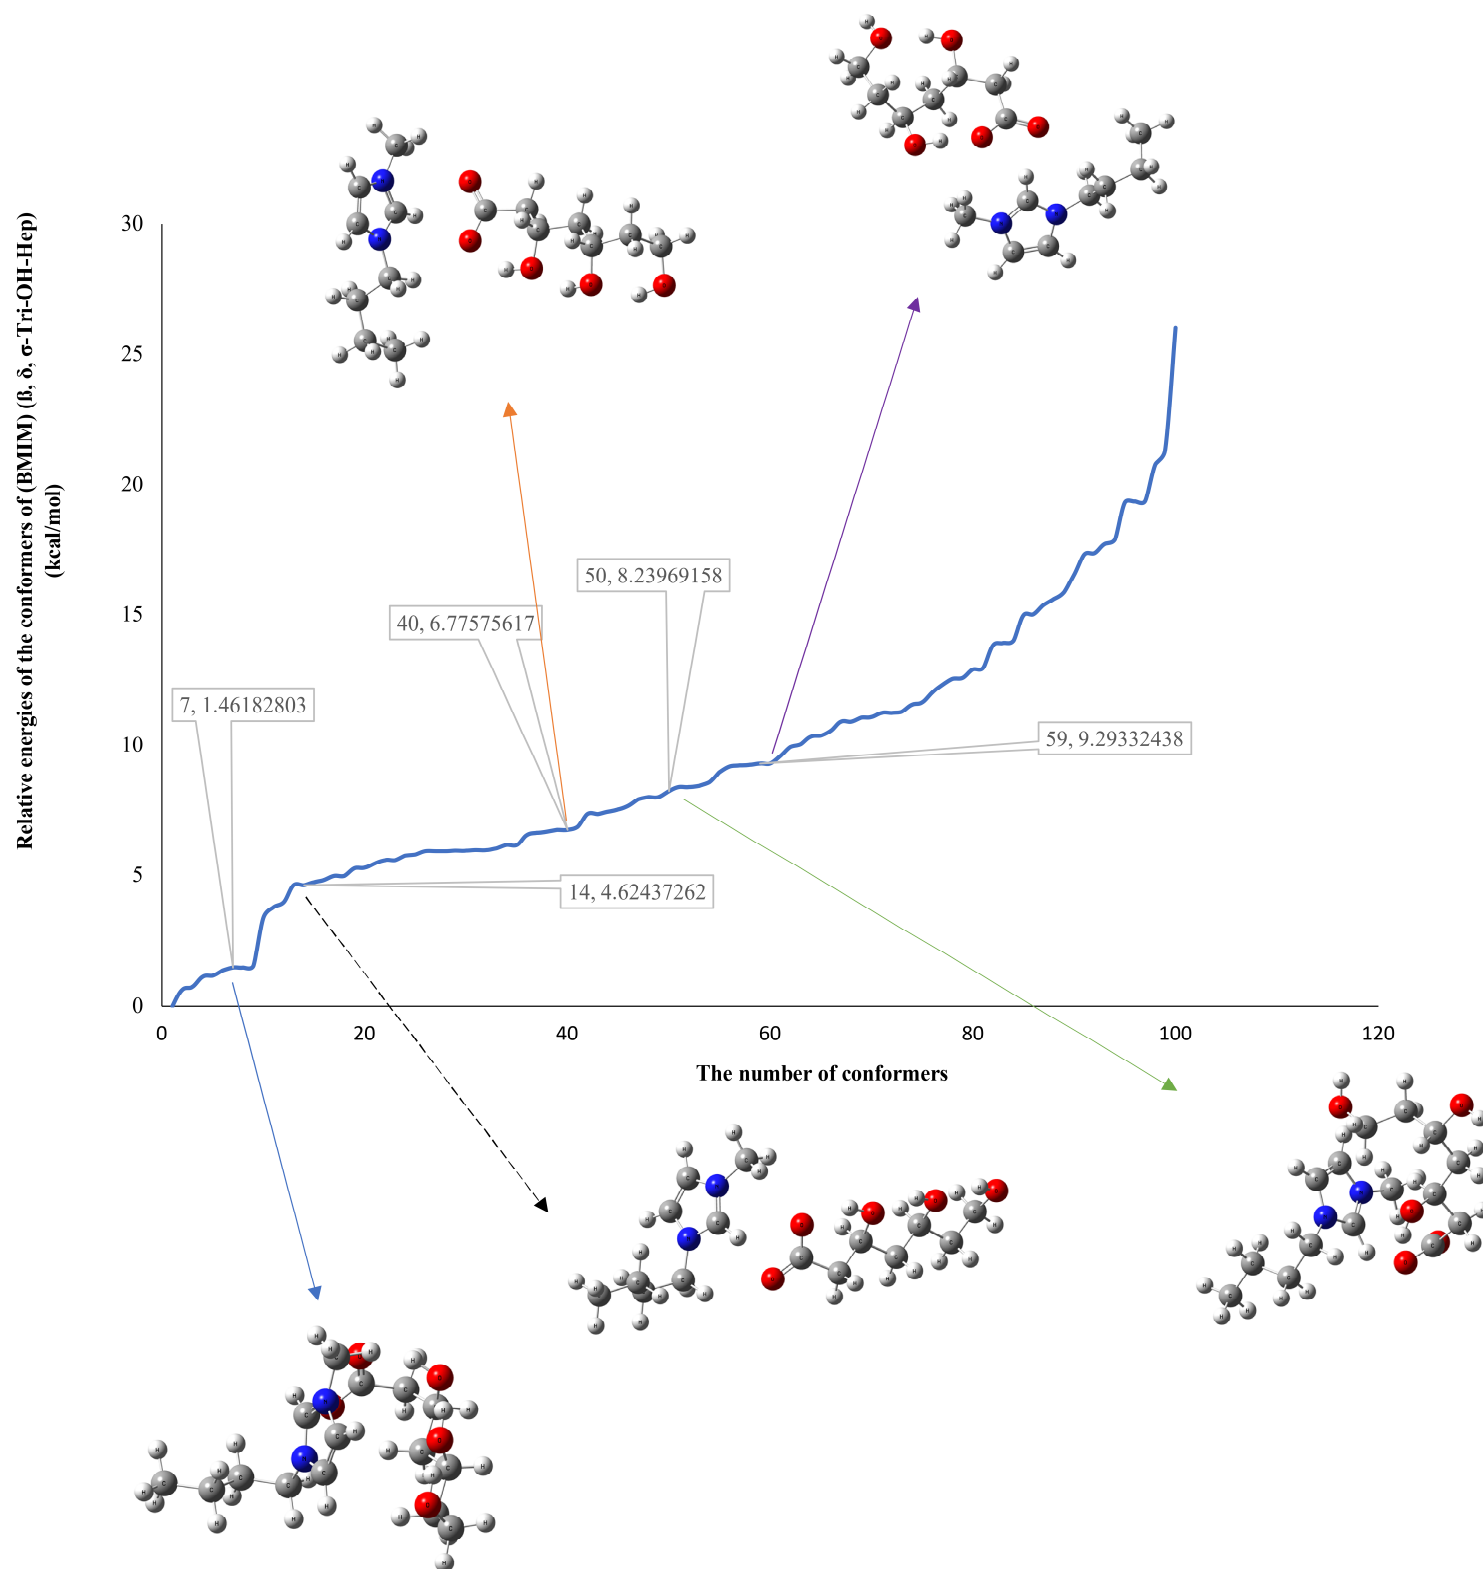

**Figure S10.** Relative energies of the conformers of (BMIM) ( $\beta$ ,  $\delta$ ,  $\sigma$ -Tri-OH-Hep) with respect to the most stable conformer



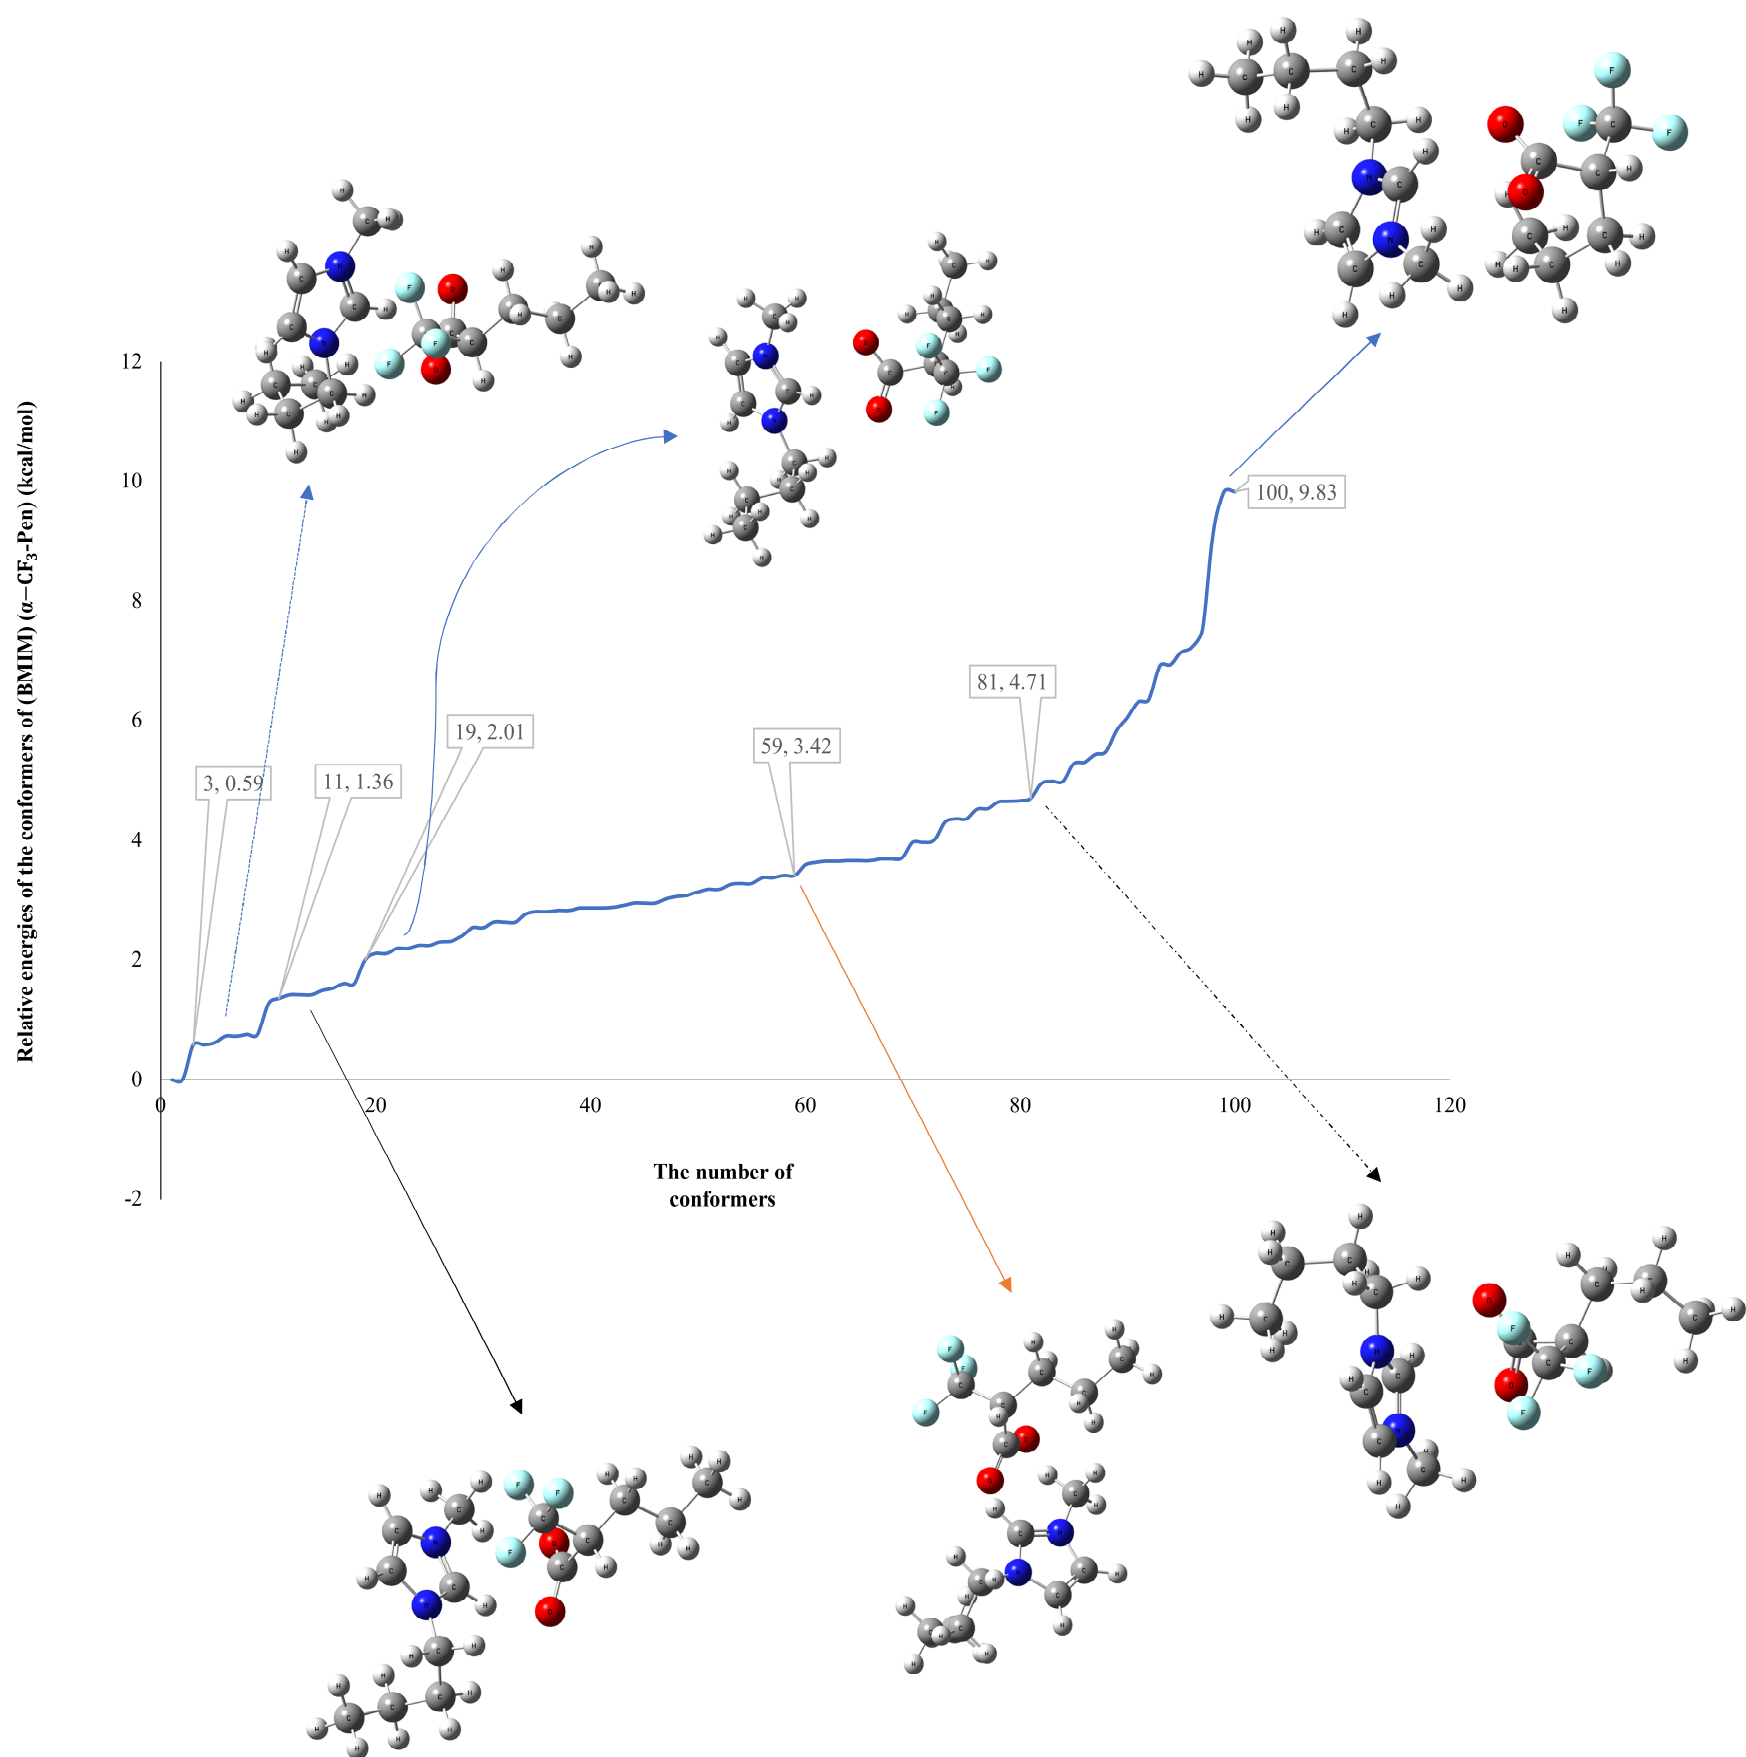

**Figure S11.** Relative energies of the conformers of (BMIM) ( $\alpha$ -CF<sub>3</sub>-Pen) with respect to the most stable conformer

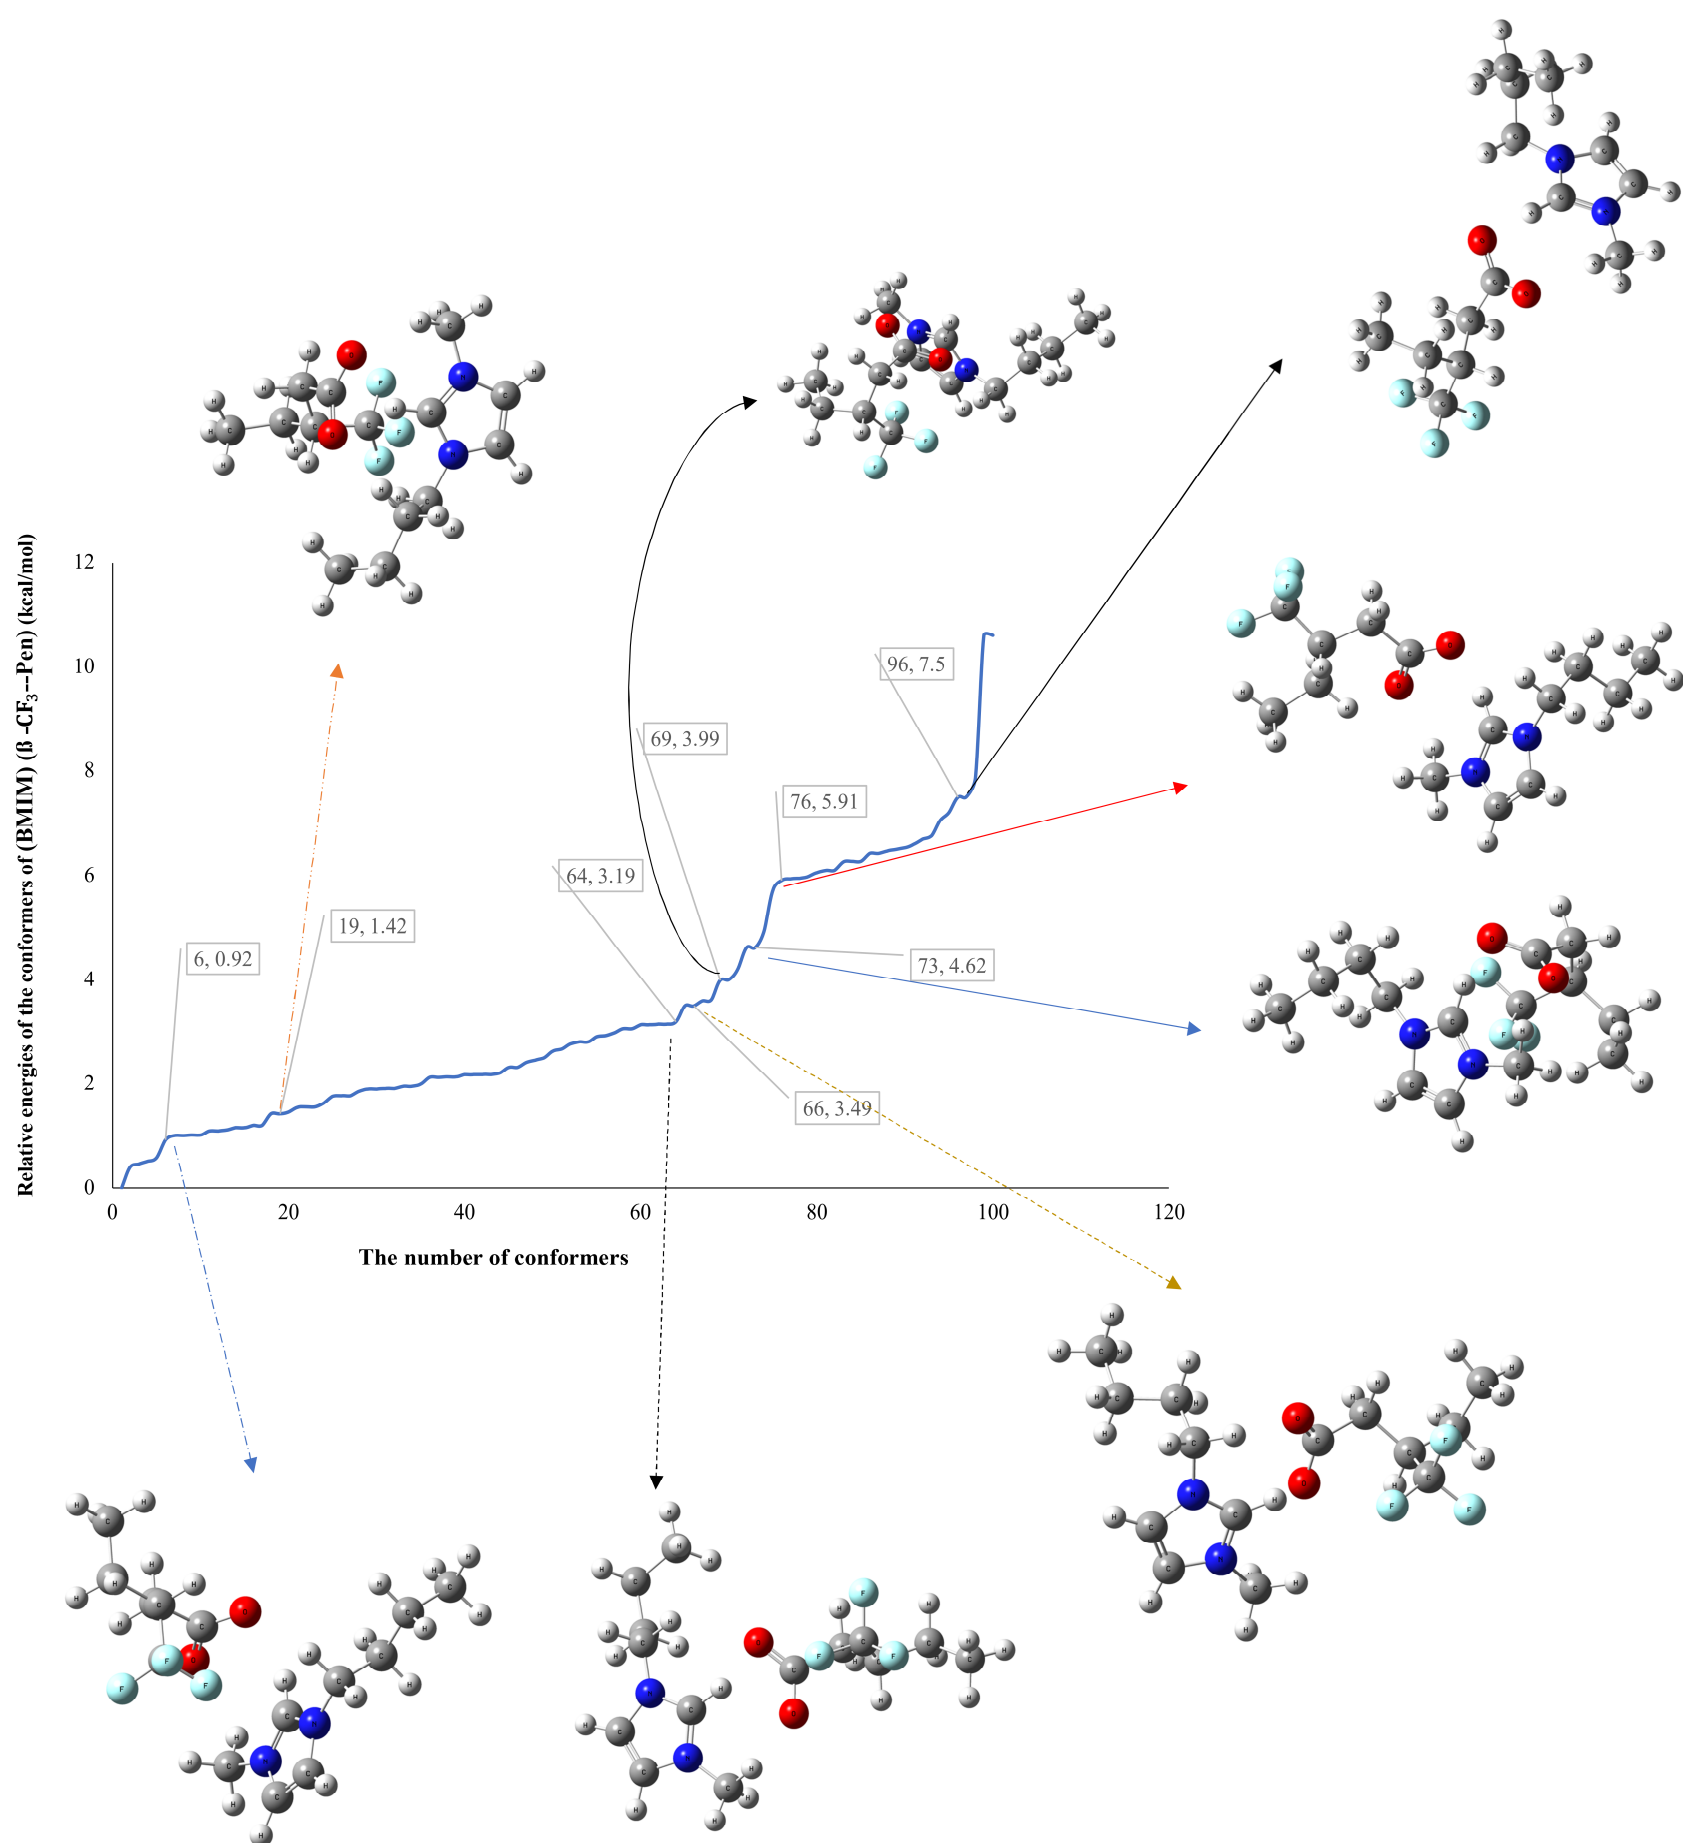

**Figure S12.** Relative energies of the conformers of (BMIM)( $\beta$ -CF<sub>3</sub>-Pen) with respect to the most stable conformer
