# Supplementary material for: Design of carboxylate-based ionic liquids (ILs) containing OH and CF3 groups; influence of intramolecular hydrogen bonds and inductive effect on the binding energy between the cation and anion of ILs, a DFT study
Source: Royal Society of Chemistry journal article supplement (doi:10.1039/d0nj04176a), 2021-01-01
Supplement: d0nj04176a4.pdf [file d0nj04176a4.pdf]

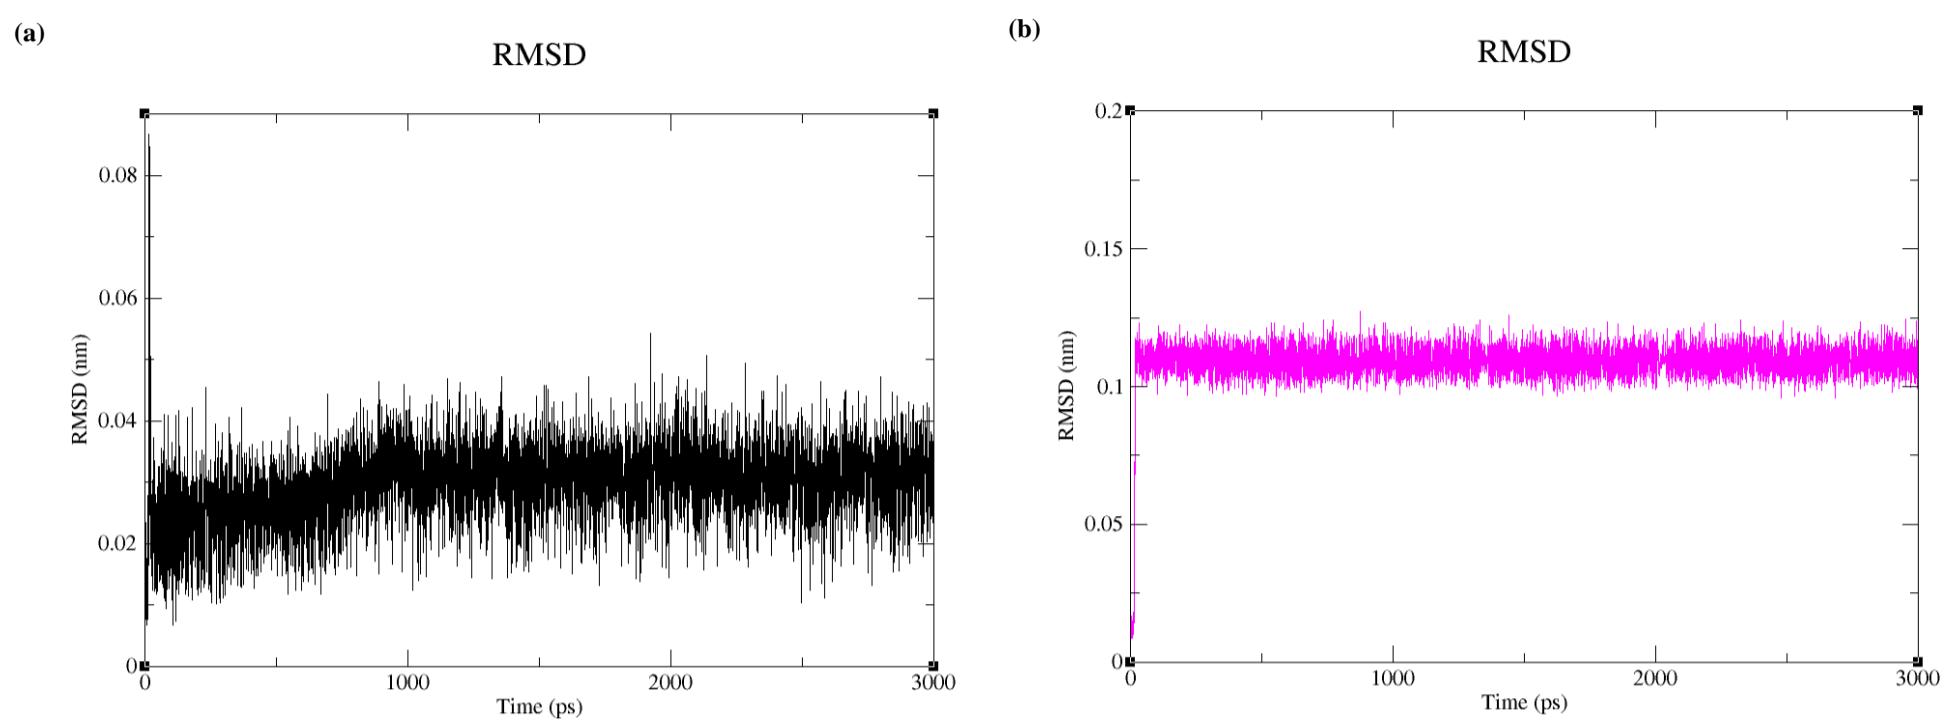

**Figure S21.** (a) RMSD values of BMIM (during 3ns of MD simulation) with respect to the Optimized geometry of (BMIM) ( $\beta$ -OH-Pen) which was calculated at B3LYP/6-311++G (d, p) level. (b) RMSD values of ( $\beta$ -OH-Pen) (during 3ns of MD simulation) with respect to the Optimized geometry of (BMIM) ( $\beta$ -OH-Pen) which was calculated at B3LYP/6-311++G (d, p).

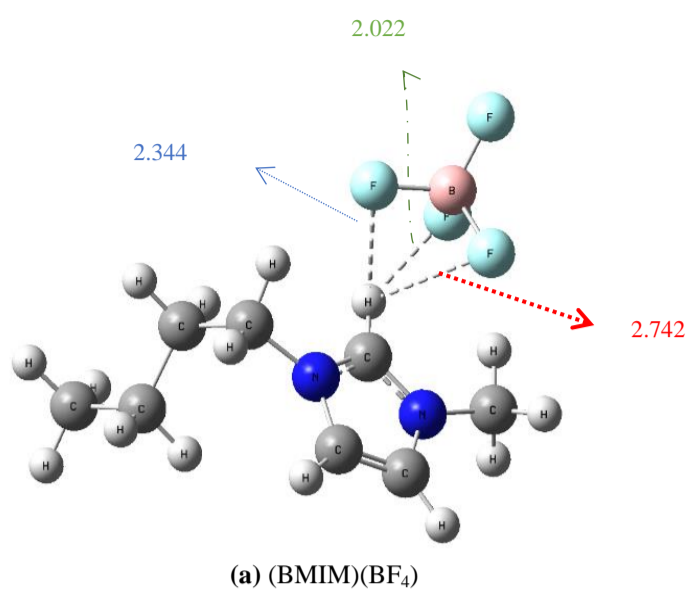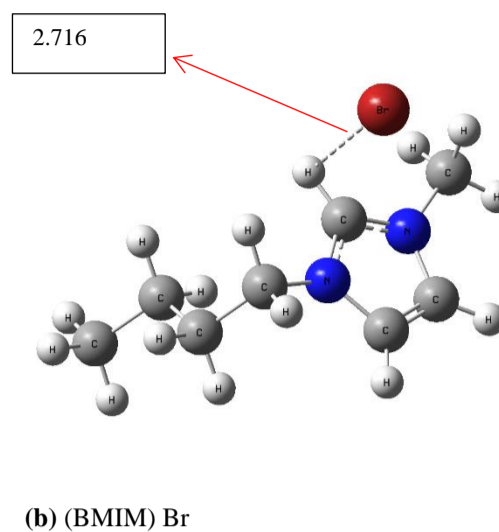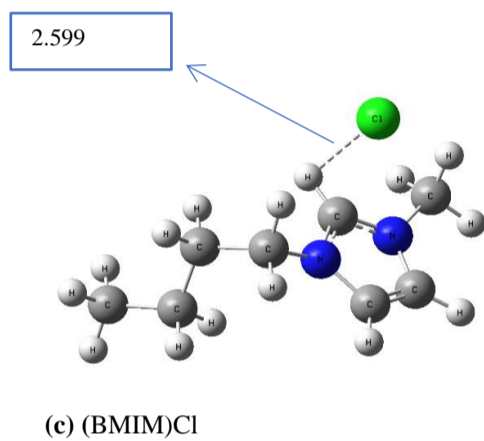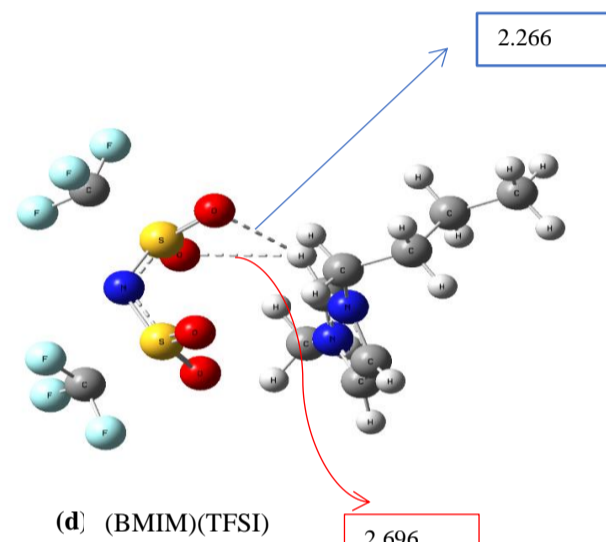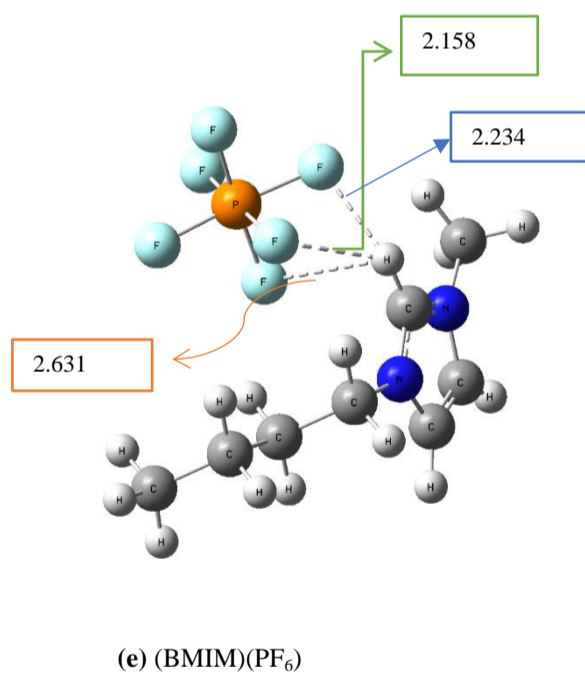

**Figure S22.** Optimized geometries of the lowest energy conformers of the known ILs including: (a) (BMIM)(BF<sub>4</sub>), (b) (BMIM)Br, (c) (BMIM)Cl, (d) (BMIM)(TFSI), and (e) (BMIM)(PF<sub>6</sub>)

**Table S1.**  $\Delta E_{int}$  and  $\Delta E_{CEC}$  (kcal/mol) values of the known ILs including: (a) (BMIM)(BF<sub>4</sub>), (b) (BMIM)Br, (c) (BMIM)Cl, (d) (BMIM)(TFSI), and (e) (BMIM)(PF<sub>6</sub>) calculated at B3LYP/6-311++ G (d, p) level alongside with their experimental melting points °C.

| Name of structures                                                      | Abbreviation              | $E_{SCF}$ (Hartree/Particle) | $\Delta E_{int}$<br>(kcal/mol) | $\Delta E_{CEC}$<br>(kcal/mol) | Melting point, °C |
|-------------------------------------------------------------------------|---------------------------|------------------------------|--------------------------------|--------------------------------|-------------------|
| <b>tetrafluoroborate</b>                                                | (BF <sub>4</sub> )        | -424.6616                    |                                |                                |                   |
| <b>1-butyl-3-methylimidazolium</b>                                      | (BMIM)                    | -423.05161                   |                                |                                |                   |
| <b>chloride</b>                                                         | Cl                        | -460.30231                   |                                |                                |                   |
| <b>1-butyl-3-methylimidazolium chloride</b>                             | (BMIM) Cl                 | -883.49464                   | -88.3                          | 88.3                           | 89                |
| <b>1-butyl-3-methylimidazolium tetrafluoroborate</b>                    | (BMIM) (BF <sub>4</sub> ) | -847.84118                   | -80.3                          | 80.3                           | -82               |
| <b>bromide</b>                                                          | Br                        | -423.05161                   |                                |                                |                   |
| <b>1-butyl-3-methylimidazolium bromide</b>                              | (BMIM) Br                 | -2997.42117                  | -83.6                          | 83.6                           | 60                |
| <b>hexafluorophosphate</b>                                              | (PF <sub>6</sub> )        | -940.87213                   |                                |                                |                   |
| <b>1-butyl-3-methylimidazolium hexafluorophosphate</b>                  | (BMIM) (PF <sub>6</sub> ) | -1364.04423                  | -75.6                          | 75.6                           | 10                |
| <b>trifluoromethyl sulfonate</b>                                        | (TF)                      | -961.69669                   |                                |                                |                   |
| <b>1-butyl-3-methylimidazolium trifluoromethyl sulfonate</b>            | (BMIM)(TF)                | -1384.87053                  | -76.7                          | 76.7                           | -15               |
| <b>bis (trifluoromethyl sulfonyl) amide</b>                             | TFSI                      | -1827.54373                  |                                |                                |                   |
| <b>1-butyl-3-methylimidazolium bis (trifluoromethyl sulfonyl) amide</b> | (BMIM)(TFSI)              | -2250.70975                  | -71.8                          | 71.8                           | -8                |

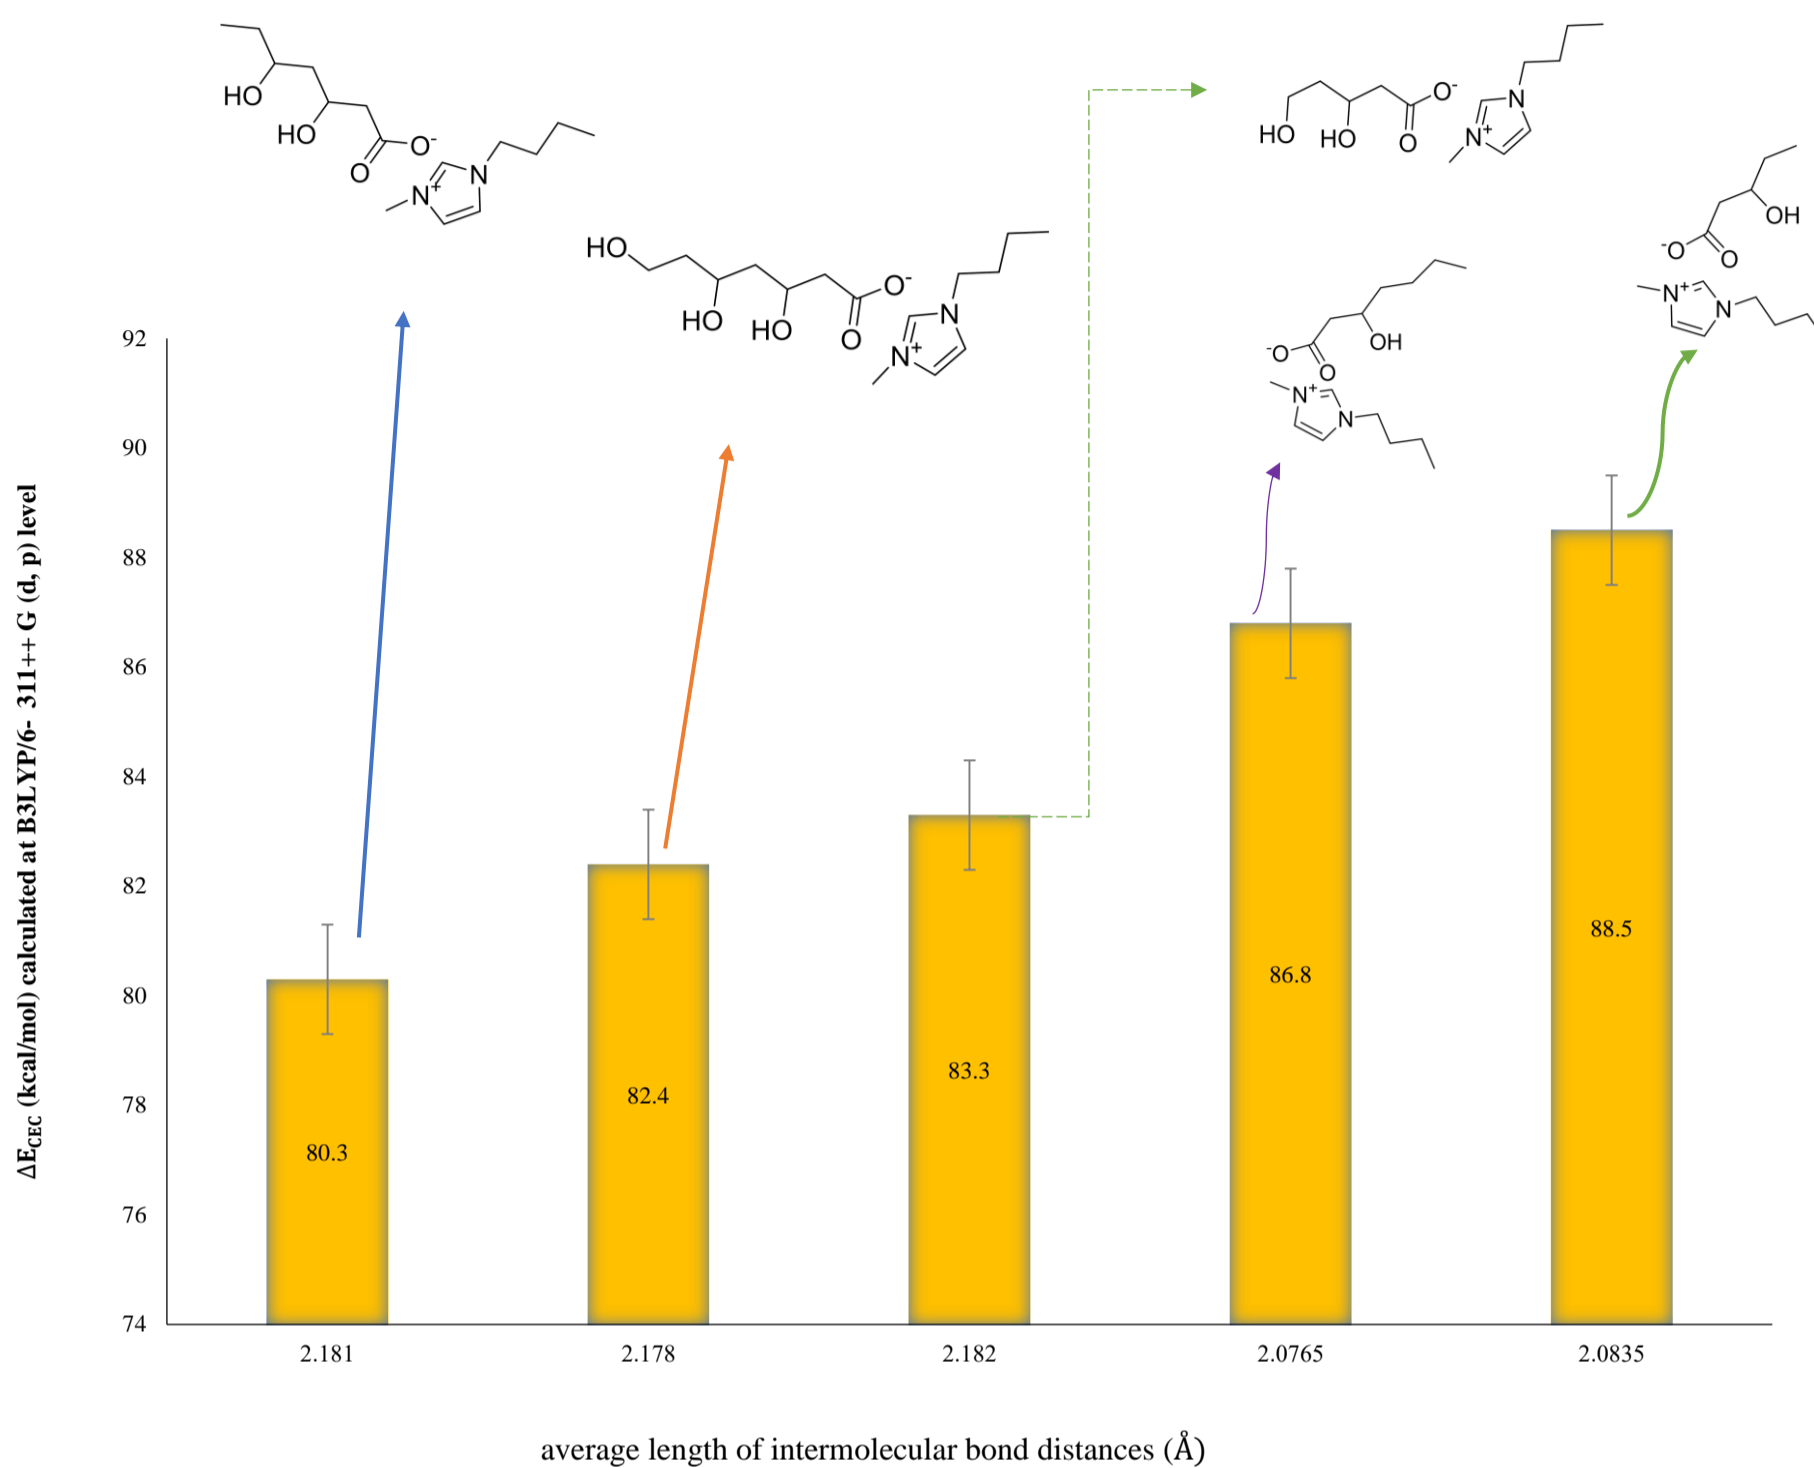

**Figure S23.**  $\Delta E_{CEC}$  (kcal/mol) calculated at B3LYP/6-311++ G (d, p) level and average length of intermolecular bond distances (Å) in the ionic liquids including (BMIM) ( $\beta$ -OH-Pen), (BMIM) ( $\beta, \delta$ -DI-OH-Pen), (BMIM)( $\beta$ -OH-Hep), (BMIM) ( $\beta, \delta$ -DI-OH-Hep) and (BMIM) ( $\beta, \delta, \sigma$ -Tri-OH-Hep).

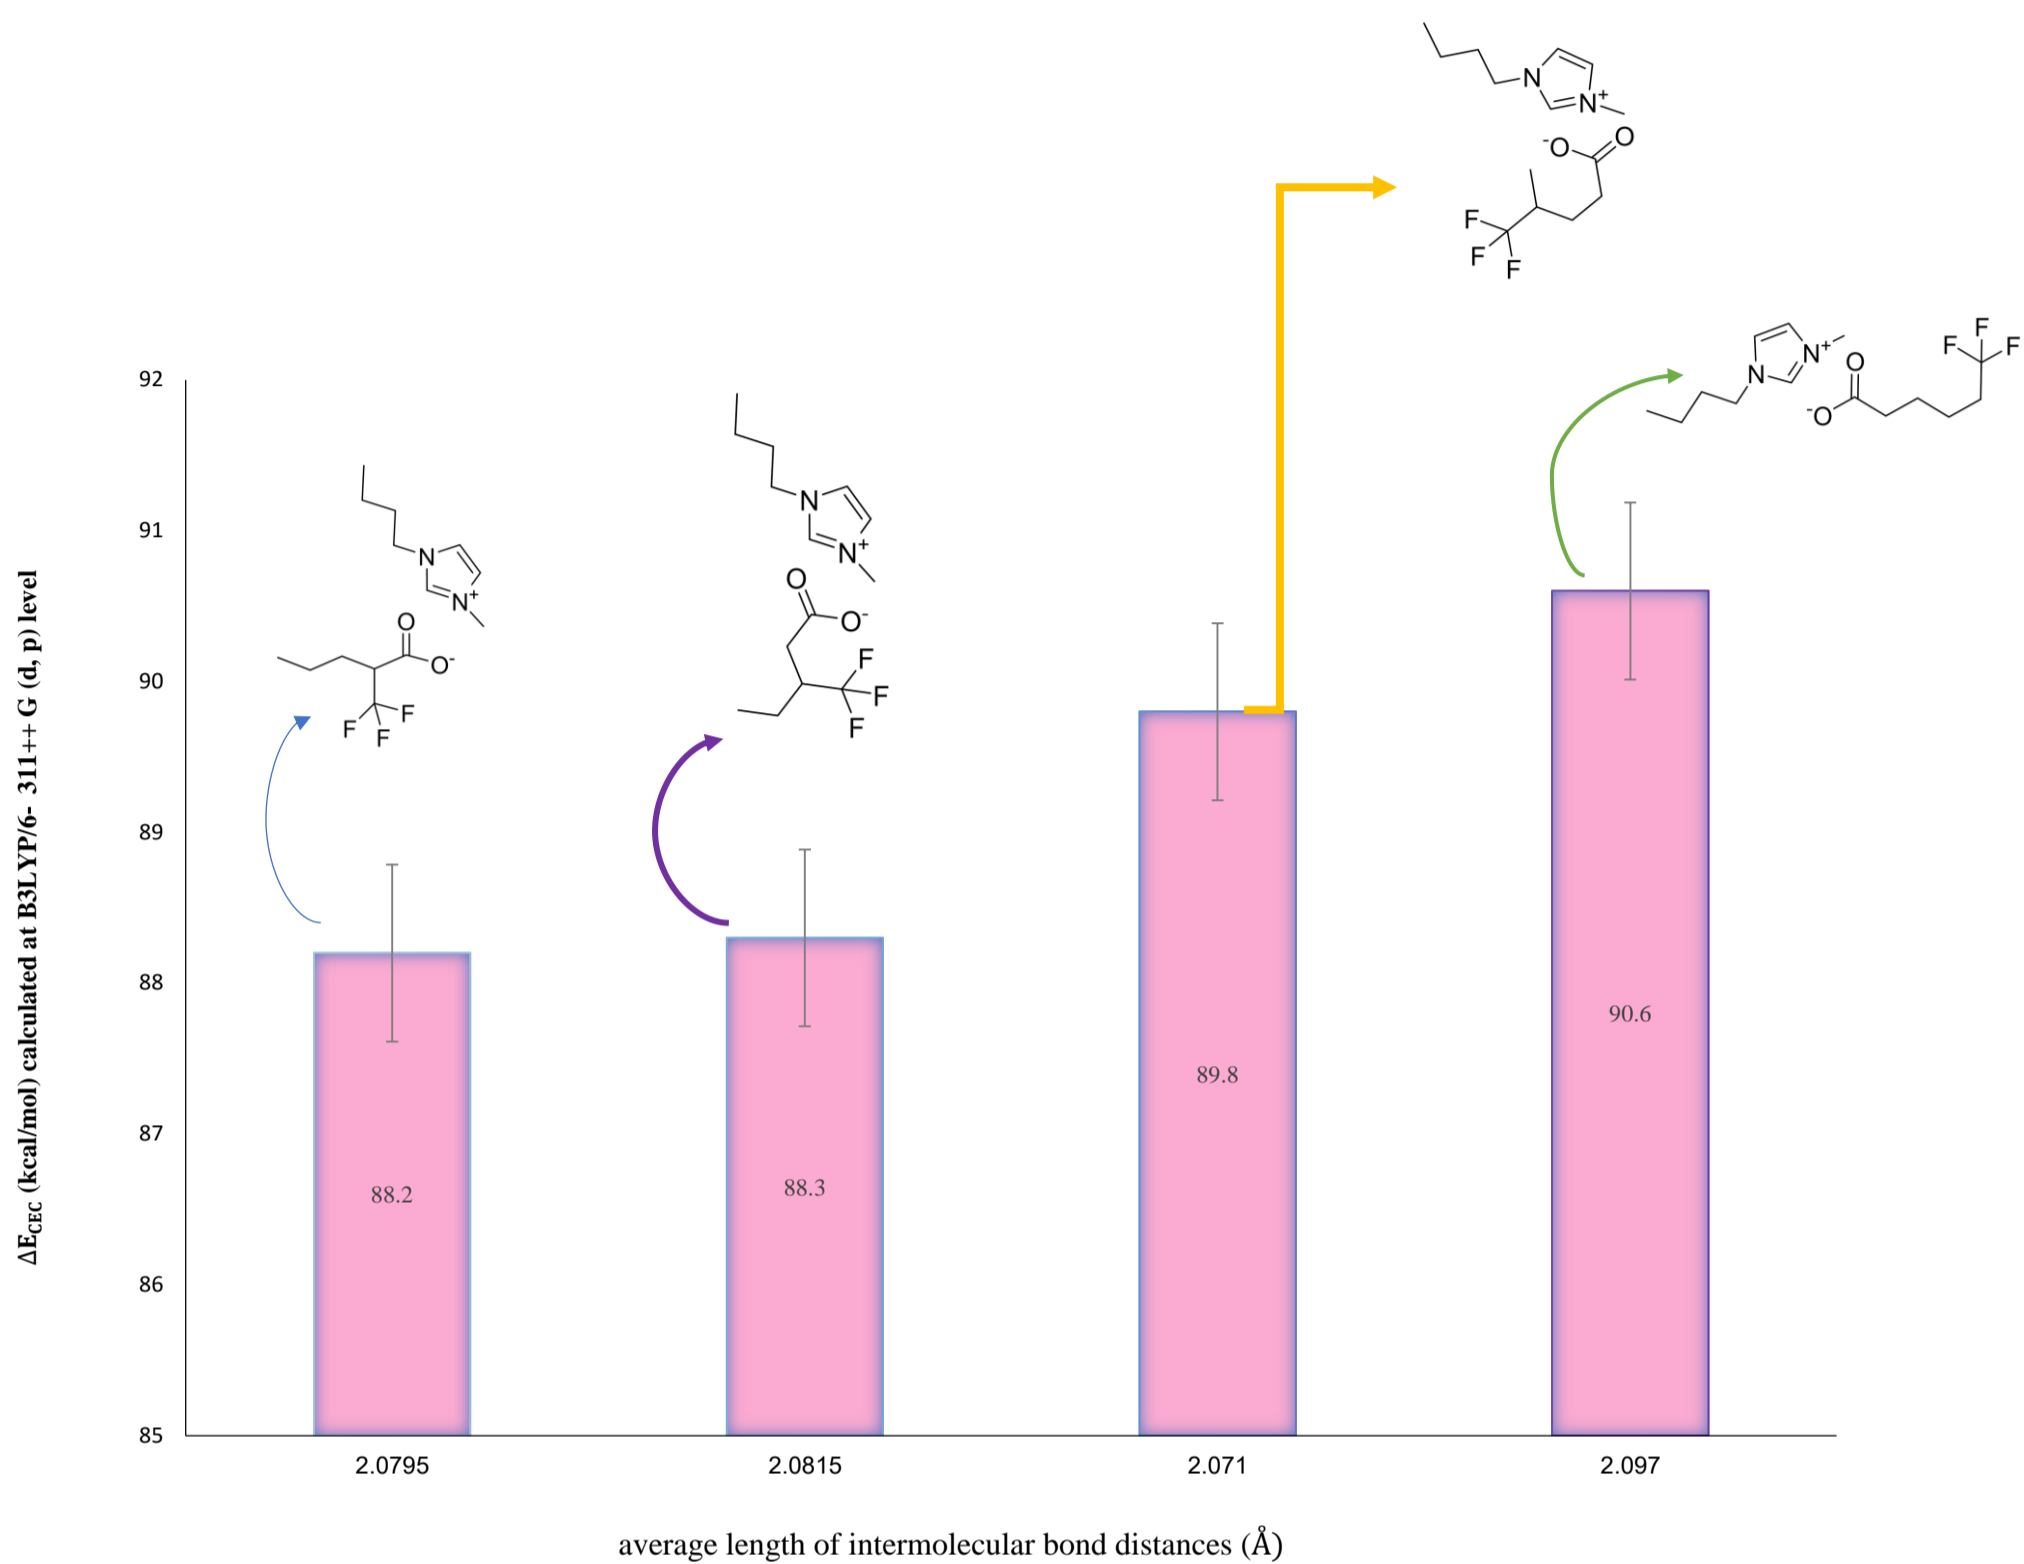

**Figure S24.**  $\Delta E_{\text{CEC}}$  (kcal/mol) calculated at B3LYP/6-311++ G (d, p) level and average length of intermolecular bond distances (Å) in CF<sub>3</sub>-containing carboxylate-based ILs including: (BMIM)( $\alpha$ -CF<sub>3</sub>-Pen), (BMIM)( $\beta$ -CF<sub>3</sub>-Pen), (BMIM), (BMIM)( $\gamma$ -CF<sub>3</sub>-Pen) and (BMIM)( $\delta$ -CF<sub>3</sub>-Pen) at B3LYP/6-311++ G (d, p).
